# Supplementary material
Source: PubMed Central journal article supplement (PMC3566641)
Supplement: NIHMS427099-supplement-1_si_001.pdf [file NIHMS427099-supplement-1_si_001.pdf]

**Supporting Information for:**

**Mapping Inhibitor Binding Modes on an Active  
Cysteine Protease via NMR Spectroscopy**

Gregory M. Lee<sup>1</sup>, Eaman Balouch<sup>1</sup>, David H. Goetz<sup>1</sup>, Ana Lazic<sup>1</sup>,  
James H. McKerrow<sup>2</sup>, and Charles S. Craik<sup>1\*</sup>

<sup>1</sup> Department of Pharmaceutical Chemistry  
University of California, San Francisco, CA 94158-2280  
USA

<sup>2</sup> Department of Pathology and  
Center for Discovery and Innovation in Parasitic Diseases  
University of California, San Francisco, CA, 94158-2250  
USA

\* Correspondence should be addressed to C.S.C.

email: [craik@cgl.ucsf.edu](mailto:craik@cgl.ucsf.edu)

Tel: (415) 476-8146

Short title: Cruzain-inhibitor NMR assay

## SUPPORTING INFORMATION TABLE OF CONTENTS

|                                                                                                                                         |    |
|-----------------------------------------------------------------------------------------------------------------------------------------|----|
| <b>Supporting Methods</b> .....                                                                                                         | 3  |
| <b>Supporting Results</b> .....                                                                                                         | 6  |
| <b>Fig. S1:</b> $^{15}\text{N}$ - $^1\text{H}$ HSQC spectra of protonated and deuterated cruzain in complex with K777.....              | 9  |
| <b>Fig. S2:</b> Selectively labeled Cys and His resonances in the $^{15}\text{N}/^1\text{H}$ -HSQC spectrum.....                        | 11 |
| <b>Fig. S3:</b> CD denaturation study of cruzain-K777 and procruzain.....                                                               | 12 |
| <b>Fig. S4:</b> Backbone dynamics data of K777-inhibited cruzain.....                                                                   | 13 |
| <b>Fig. S5:</b> Summary of the cruzain-inhibitor $^{15}\text{N}$ -Cys shift perturbation data.....                                      | 15 |
| <b>Fig. S6:</b> Summary of the cruzain-inhibitor $^{15}\text{N}$ -His shift perturbation data.....                                      | 16 |
| <b>Fig. S7:</b> Summary of the cruzain-inhibitor $^{13}\text{C}$ -Met shift perturbation data.....                                      | 17 |
| <b>Fig. S8:</b> Comparison of NMR-based pH titration curves of MMTS and K777 inhibited $^{15}\text{N}$ -His cruzain.....                | 18 |
| <b>Fig. S9:</b> Comparison of NMR-based pH titration curves of MMTS and K777 inhibited $^{15}\text{N}$ -Cys cruzain (part 1).....       | 20 |
| <b>Fig. S10:</b> Comparison of NMR-based pH titration curves of MMTS and K777 inhibited $^{15}\text{N}$ -Cys cruzain (part 2) .....     | 22 |
| <b>Fig. S11</b> Comparison of NMR-based pH titration curves of MMTS and K777 inhibited $^{13}\text{C}$ -Met cruzain.....                | 24 |
| <b>Table S1:</b> U- $^{13}\text{C}/^{15}\text{N}/^2\text{H}$ -cruzain + K777 resonance assignments.....                                 | 26 |
| <b>Table S2:</b> Selectively $^{15}\text{N}$ -His, $^{15}\text{N}$ -Cys, $^{13}\text{C}$ -Met labeled cruzain $\text{pK}_a$ values..... | 32 |
| <b>References</b> .....                                                                                                                 | 33 |

## SUPPORTING METHODS

### Modifications to auto-induction media recipes<sup>1</sup>

For the initial growth tests, unmodified auto-induction recipe ZYP-5052<sup>1</sup> was used to express unlabeled cruzain. In the case of the N-5052 (uniform <sup>15</sup>N-labeling) and PA-5052 (selective <sup>15</sup>N-Cys, <sup>15</sup>N-His, and <sup>13</sup>C-Met labeling) auto-induction media recipes,<sup>1</sup> the base buffer consisted of 6.8 g Na<sub>2</sub>HPO<sub>4</sub>, 3.0 g KH<sub>2</sub>PO<sub>4</sub> (~ 70 mM phosphate, pH ~ 7.0) and 1.5 g NaCl (~ 25 mM) dissolved in 1 L water. No Na<sub>2</sub>SO<sub>4</sub> was used in this base buffer. Following autoclaving and cooling to room temperature, the solution was supplemented with 2 mM MgSO<sub>4</sub>, 30 μM CaCl<sub>2</sub>, 1.0 mL vitamin solution, and 2 mL “O” solution containing trace metals.<sup>2</sup> Carbon sources in the form of sterile-filtered 0.5% glycerol (v/v), 0.05% glucose (w/v), and 0.2% lactose (w/v) were as recommended<sup>1</sup> and also added after the autoclaved buffer cooled. In the case of uniform <sup>15</sup>N-labeling (recipe N-5052), the sole nitrogen source was 2.7 g <sup>15</sup>NH<sub>4</sub>Cl (50 mM). In the case of selective <sup>15</sup>N- or <sup>13</sup>C-labeling (recipe PA-5052), 26.6 mL of a sterile-filtered 0.75% (w/v) stock amino acid solution was added to the growth media, with a final concentration of 200 mg/L of each unlabeled amino acid. Due to limited solubility, 200 mg tyrosine was added directly to 1 L media. In addition, the stock solution did not contain cysteine, histidine, and methionine. Depending on the selective labeling scheme, 100 mg/L <sup>15</sup>N-Cys or <sup>15</sup>N-His, or 250 mg/L <sup>13</sup>C-Met, and 200 mg/L of the other remaining unlabeled amino acids were dissolved in a 30-40 mL aliquot of the auto-induction media, which was then reintroduced via sterile filtering. In the case of uniform <sup>13</sup>C/<sup>15</sup>N/<sup>2</sup>H-labeling (recipe C-750501), the labeled rich media mixture was supplemented with 0.05% (w/v) <sup>13</sup>C/<sup>2</sup>H-labeled glucose (Cambridge Isotope Laboratories) and 0.75% (w/v) unlabeled glycerol and 0.01% (w/v) unlabeled lactose

### NMR Spectral Parameters and Processing

Spectral offsets (widths) for the 3D HNCACB, HN(CO)CACB, CC(CO)NH experiments were as follows: <sup>1</sup>H, 4.703 ppm (16.02 ppm); <sup>13</sup>C, 39.0 ppm (75.0 ppm); <sup>15</sup>N, 117.0 ppm (40.0 ppm). 12 transients, with 32 dummy scans used to reach thermal equilibrium, and

1024  $^1\text{H}$ , 44  $^{13}\text{C}$ , and 128  $^{15}\text{N}$  complex data points were collected for each experiment. Data was collected in Echo-AntiEcho mode for the  $^{13}\text{C}$ -dimension, States-TPPI mode for the  $^{15}\text{N}$ -dimension and with  $^2\text{H}$ -decoupling applied. General parameters for the 3D-HNCO experiment were the same as for the other triple-resonance experiments with the exception of  $^{13}\text{C}$ : 173.0 ppm offset, 14.0 ppm spectral width, and 72 complex data points. The total acquisition time for all four of the 3D-triple resonance experiments was approximately 100 hours. The  $^1\text{H}$  and  $^{15}\text{N}$  spectral offsets (widths) for the 3D- $^{15}\text{N}/^1\text{H}$ -NOESY-HSQC were as above. 32 transients, 32 dummy scans, and 1024 (t3)  $^1\text{H}$ , 48 (t1)  $^1\text{H}$ , and 128  $^{15}\text{N}$  complex data points were collected. The NOESY mixing time was set to 120 ms, and the total acquisition time was approximately 67 hours.

Spectral offsets and widths for the  $^{15}\text{N}$ -HSQC and  $^{13}\text{C}$ -HSQC titration experiments were as follows:  $^1\text{H}$ , 4.70 ppm (16.0 ppm for  $^{15}\text{N}$ , 12.0 ppm for  $^{13}\text{C}$ );  $^{15}\text{N}$ , 117.0 ppm (34.0 ppm);  $^{13}\text{C}$ , 17.0 ppm (18.0 ppm). 32 to 128 transients, 16 dummy scans, and 1024  $^1\text{H}$  and 96  $^{15}\text{N}$  or  $^{13}\text{C}$  complex data points were collected for each spectrum. The acquisition time for the 2D-HSQC experiments ranged from 1 to 4 hours each. Polynomial baseline correction to deconvolute residual  $^1\text{HO}^2\text{H}$  signals, squared sine bell apodization functions and zero-filling were applied to both dimensions of the raw data using NMRpipe<sup>3</sup> prior to Fourier transformation. Linear prediction was also applied to the indirectly-detected  $^{15}\text{N}$  or  $^{13}\text{C}$  dimensions as needed.

### **NMR-based pH Titrations**

NMR sample preparation was as described above. Initial sample concentrations were 0.050 – 0.075 mM selectively  $^{15}\text{N}$ -His,  $^{15}\text{N}$ -Cys, or  $^{13}\text{C}$ -Met labeled cruzain in 0.5 mL 20 mM phosphate buffer. HSQC spectra were acquired from pH 3 – 10 at approximately 0.5 pH unit intervals. Prior to acquiring the first pH data point, cruzain samples were inhibited with either MMTS or K777 to prevent self-proteolysis. 1 mM DTT (final concentration) was added to the cruzain-K777 samples. Spectra of the MMTS-inhibited cruzain samples were acquired without additional reducing agents. Determination of apparent  $\text{pK}_a$  values of the selectively labeled  $^{15}\text{N}$ -His,  $^{15}\text{N}$ -Cys, and  $^{13}\text{C}$ -Met residues

were performed using the Ekin module of PEAT\_DB,<sup>4</sup> using previously described equations and curve fitting models.<sup>5</sup> Estimated experimental errors of  $\pm 0.1$  pH units and  $\pm 0.05$  ppm were used for the individual residue curve fittings, each performed in triplicate. Reported  $pK_a$  values represent the average and propagated errors calculated for the proton and either nitrogen or carbon titration curves.

### **Cruzain Residue Numbering**

There are currently two main residue numbering systems associated with cruzain. The first, we have termed the “classical” system, is based upon papain residue numbers.<sup>6</sup> The second, termed the “sequential” system, is used in the published cruzain-K777 crystal structure (2OZ2)<sup>7</sup> and for many subsequent cruzain-inhibitor structures published since 2009. In the “classical” numbering system, the catalytic residues are identified as Gln19, Cys25, His159, and Asn175. In the “sequential” numbering system, these residues are Gln19, Cys25, His162, and Asn182. The cruzain residue numbering used herein uses the “sequential” system.

## SUPPORTING RESULTS

### **K777 can limit *in vitro* cruzain self-activation.**

To determine whether *in vitro* self-activation of the zymogen can be inhibited, five-fold stoichiometric excess of K777 was added to MMTS- and PMSF-inhibited procrucain prior to activation with DTT (**Figure 1c**). Examination of the SDS-PAGE gel indicates that the untreated procrucain undergoes proteolysis of the 14 kDa pro-region segment after 30 minutes incubation time. Conversely, the K777-treated procrucain remains relatively intact after 3 hours. Weak bands with approximate molecular weights larger than activated cruzain appear at the 30 – 60 minute mark. This result implies that excess DTT may also form thiol adducts to K777, thereby preventing inhibitor binding to the zymogen, and that the remaining uninhibited procrucain retains basal proteolytic activity. Therefore, pre-treatment of procrucain with K777 can impede, but not completely abolish self-activation under the current conditions. The higher molecular weight bands observed in the SDS-PAGE gel also suggest that sections of the pro-region are proteolyzed in a step-wise manner, eventually leading to the mature catalytic domain sequence.

### **Apparent cruzain pK<sub>a</sub> values.**

In addition to helping probe inhibitor binding modes to cruzain, the selective <sup>15</sup>N-Cys, <sup>15</sup>N-His, and <sup>13</sup>C-Met labeled cruzain samples were used to determine apparent pK<sub>a</sub> values in an effort to gain further insight into general cysteine protease mechanisms (**Supplemental Figs. S8-S11**). Because the apo-form of cruzain was too unstable, the protease was inhibited with MMTS, and the HSQC data were acquired in the absence of any reducing agents. The resulting methanethiol adduct is a minimal modification of the catalytic Cys25 thiol group and serves as a proxy for the apo state. The averaged pK<sub>a</sub> values determined from the proton and heteronucleus titration curves are reported in **Supplemental Table S2**. Several residues also displayed biphasic pH titration curves. In these cases, the “primary pK<sub>a</sub> value” (pK<sub>a1</sub>) and “secondary pK<sub>a</sub> value” (pK<sub>a2</sub>)

described below would correspond to the acidic and basic pH arms of the titration curves, respectively.

Local inter-residue ionization effects are observed for the histidine residues (**Figure S8**). For example, His115 exhibits a biphasic titration curve for the MMTS-inhibited cruzain spectra, giving rise to two apparent  $pK_a$  values ( $pK_{a1} = 4.36 \pm 0.46$ ;  $pK_{a2} = 7.42 \pm 0.05$ ). A less dramatic biphasic titration curve is also observed for the catalytic His162 ( $pK_{a1} = 3.98 \pm 0.51$ ;  $pK_{a2} = 6.75 \pm 0.07$ ). In the case of the cruzain-K777 crystal structure,<sup>7</sup> the His115 side chain is in contact with those of Glu73 and Glu117, while His162 is adjacent to Asp161. The acidic  $pK_a$  value of His162 in the MMTS-inhibited cruzain sample agrees, within experimental error, with that reported for the catalytic His159 residue of MMTS-inhibited papain ( $3.45 \pm 0.07$ ),<sup>8</sup> but is significantly lower than active papain ( $8.34 \pm 0.04$ ).<sup>9</sup> These differences in apparent  $pK_a$  values may be attributed to the absence of the Cys25-His162 thiolate-imidazolium ion pair, which in the active state, is known to be critical for papain catalysis.<sup>10</sup> The remaining two histidine residues are remotely located from other ionizable residues and display monophasic titration curves with higher  $pK_a$  values (His43,  $pK_a = 8.04 \pm 0.04$ ; His106,  $pK_a = 7.88 \pm 0.02$ ).

Inhibition of cruzain with K777 induces significant perturbations in the pH titration curves and associated  $pK_a$  values for His162 ( $pK_{a1} = 5.35 \pm 0.25$ ,  $pK_{a2} = 9.13 \pm 0.74$ ). This result is likely a reflection of the K777 sulfonyl group being in close proximity ( $< 3.4 \text{ \AA}$ ) to the histidine side chain imidazole. As expected, the pH titration curves for histidine residues distally located from the cruzain active site display no significant perturbations between the MMTS and K777-inhibited states.

Because the cysteine or methionine residues have no ionizable functional groups under the current conditions, their respective amide (Cys) or methyl (Met) pH titration curves (**Supplemental Figs. S9-S11**) reflect local inter-residue ionization effects imparted by nearby acidic or basic residues.<sup>5</sup> In particular, the  $^{15}\text{N}$ -Cys and  $^{13}\text{C}$ -Met pH titration curves exhibited small chemical shift perturbation ranges and higher degrees of uncertainty relative to the  $^{15}\text{N}$ -His data. Notably, the apparent  $pK_a$  value obtained for the catalytic Cys25 of MMTS-inhibited cruzain ( $pK_a = 3.83 \pm 0.52$ ) is within experimental error with the reported value of uninhibited papain ( $pK_a = 3.32 \pm 0.01$ ).<sup>9</sup> As expected,

overall differences in the pH titration curves between the MMTS- and K777-inhibited cruzain samples are more significant for the residues located within or proximal to the active site.

With the exception of Cys101 ( $pK_a = 7.06 \pm 0.13$ ), all the cysteine residues exhibit primary  $pK_a$  values less than pH 6.0 in both the MMTS- and K777-inhibited cruzain samples. Although the majority of the cysteine residues are located in the predominantly negatively charged regions of the protease, close contacts between Cys101 and the side chain of Lys58 may increase its apparent  $pK_a$  value. Several of the cysteine residues also displayed secondary  $pK_a$  values greater than pH 7.0 (**Supplemental Figs. S9-S10**). Cys25 ( $pK_a = 3.83 \pm 0.52$ ) and Cys155 ( $pK_a = 3.82 \pm 0.36$ ) have the most acidic  $pK_a$  values of any of the cysteine groups in the cruzain-MMTS complex. Cysteine residues that had the most dramatic chemical shift perturbations between the MMTS- and K777-inhibited states (Cys22, Cys25, and Cys63) also exhibited the largest differences in their respective apparent  $pK_a$  values.

The  $^{13}\text{C}$ -Met pH titration curves displayed larger chemical shift perturbation ranges relative to the  $^{15}\text{N}$ -Cys data (**Supplemental Fig. S11**). As with the cysteine residues, the methionines are located in the predominantly negatively-charged region of cruzain. However, the apparent  $pK_a$  values of the methionines are higher than those of the cysteine residues. Of the methionines, Met68 exhibits the most dramatic change in apparent  $pK_a$  values between the MMTS- and K777-inhibited states (MMTS,  $pK_{a1} = 6.53 \pm 0.35$ ; K777,  $pK_a = 7.83 \pm 0.28$ ). Importantly, the chemical shift perturbations observed for the resonance peak of the Met68 methyl group may reflect the ionization state of the Glu208 side chain. Both residues are in contact with each other, helping to form the critical S2 pocket in cruzain.<sup>11</sup>





**Figure S1.**  $^{15}\text{N}$ - $^1\text{H}$  HSQC spectra of protonated and deuterated cruzain in complex with K777. (a) The HSQC spectrum of uniformly  $^{13}\text{C}/^{15}\text{N}/^2\text{H}$ -labeled cruzain (red) superimposed over that of uniformly  $^{13}\text{C}/^{15}\text{N}/^1\text{H}$ -labeled cruzain (black), both in complex with K777. Missing resonance peaks in the deuterated cruzain-K777 sample indicate incomplete  $^2\text{H}$  to  $^1\text{H}$  back-exchange of the backbone amide groups during protein purification. (b) The annotated  $^{15}\text{N}$ - $^1\text{H}$  HSQC spectrum of uniformly  $^{13}\text{C}/^{15}\text{N}/^2\text{H}$ -labeled cruzain in complex with unlabeled K777. Positions of the catalytic Gln19, Cys25, and His162 resonance peaks are indicated by purple boxes. The central region of the spectrum (dotted box) is annotated in the inset. Black X's indicate assigned resonances not observed in the deuterated cruzain spectra, but are present in the protonated cruzain. Red X's indicate unassigned resonance peaks. Gray annotations denote sidechain Trp, Gln, and Asn NH groups; cyan annotations denote minor conformers; and green annotations denote folded peaks corresponding to Arg sidechain NH groups.

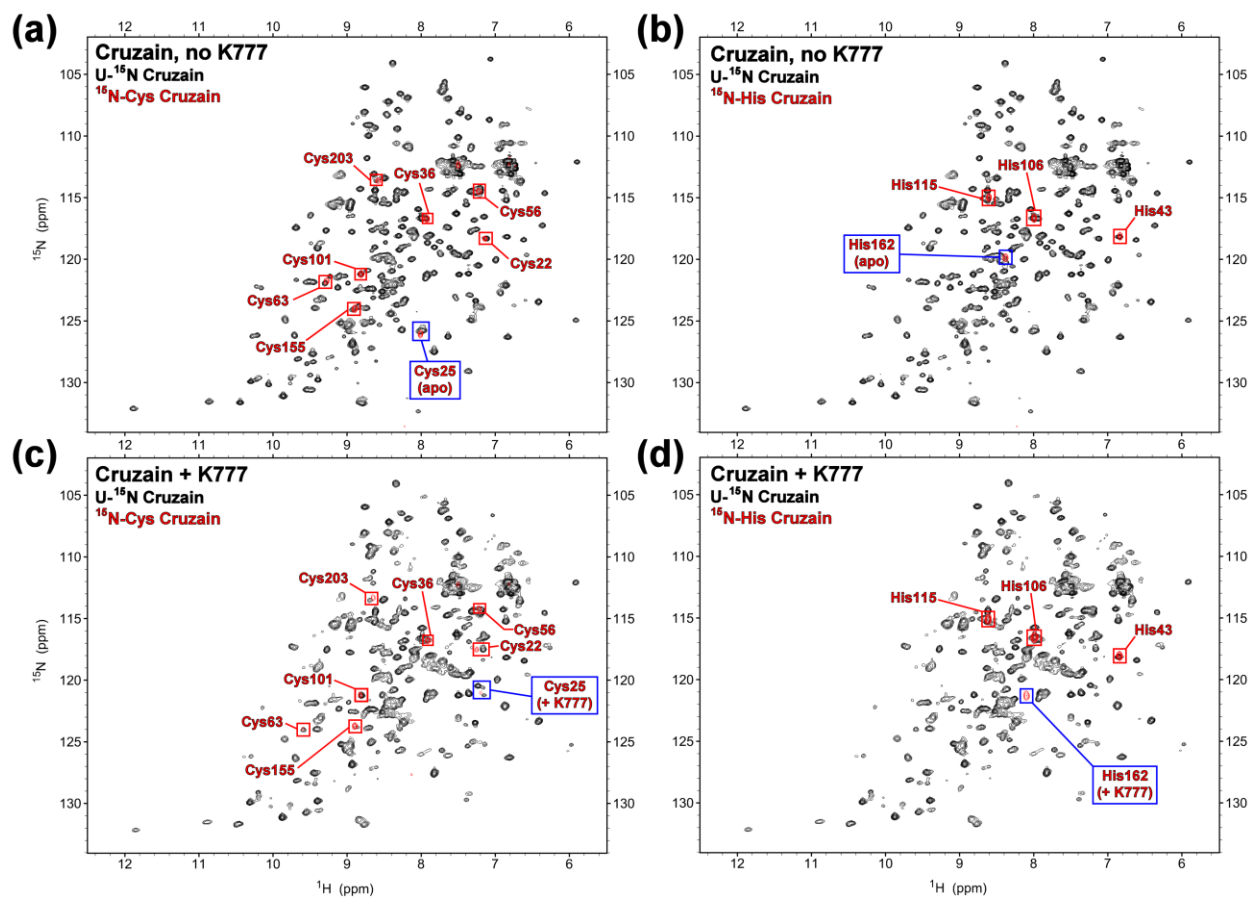

**Figure S2:** Selectively labeled Cys and His resonances in the  $^{15}\text{N}/^1\text{H}$ -HSQC spectrum. Spectral overlays of the uniformly  $^{15}\text{N}$ -labeled cruzain (black) and selectively (a)  $^{15}\text{N}$ -Cys and (b)  $^{15}\text{N}$ -His labeled cruzain (red) in their respective apo states. Spectral overlays of the uniformly  $^{15}\text{N}$ -labeled cruzain (black) and selectively (c)  $^{15}\text{N}$ -Cys and (d)  $^{15}\text{N}$ -His labeled cruzain (red) in their respective K777-inhibited forms.

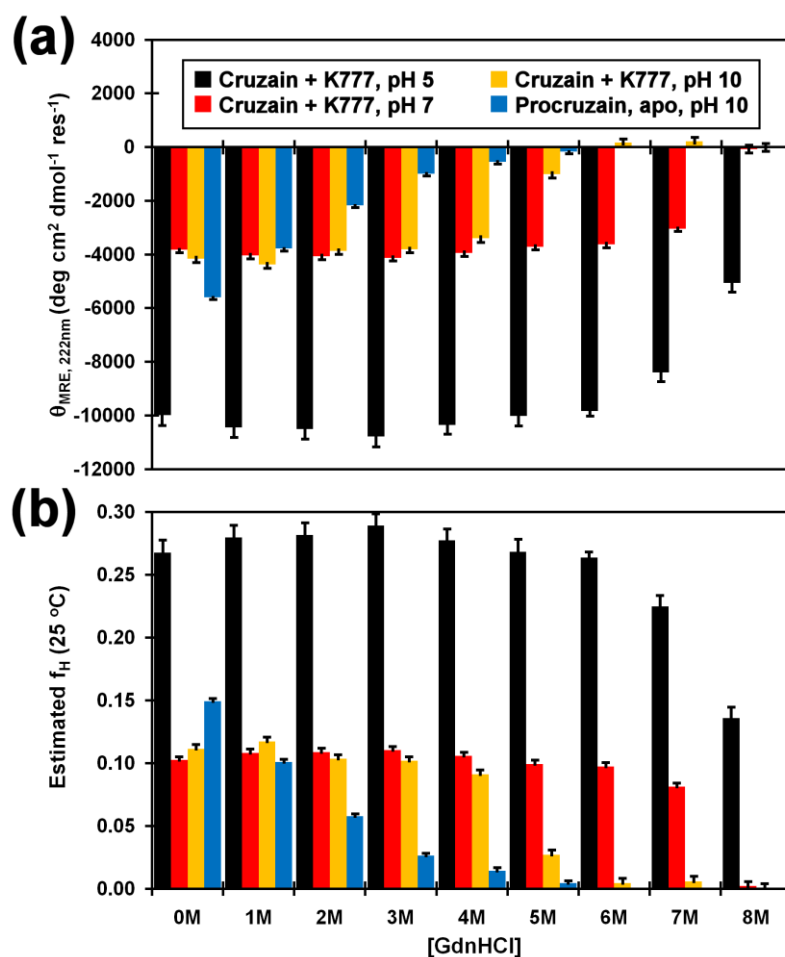

**Figure S3.** CD denaturation study of cruzain-K777 and procrucrain. **(a)** Data corresponding to the  $\theta_{222}$  bands displayed in **Figure 2** normalized and converted to units of mean residue ellipticity (MRE) as a function of final guanidinium hydrochloride concentration. **(b)**  $\theta_{222}$  data converted to estimated fractional helicity ( $f_H$ ) values. Both sets of data indicate that the cruzain-K777 exhibits enhanced helicity under acidic conditions, and is relatively stable against chemical denaturation. Conversely, the apo form of procrucrain at pH 10 is structurally labile against chemical denaturation relative to its inhibited counterpart.

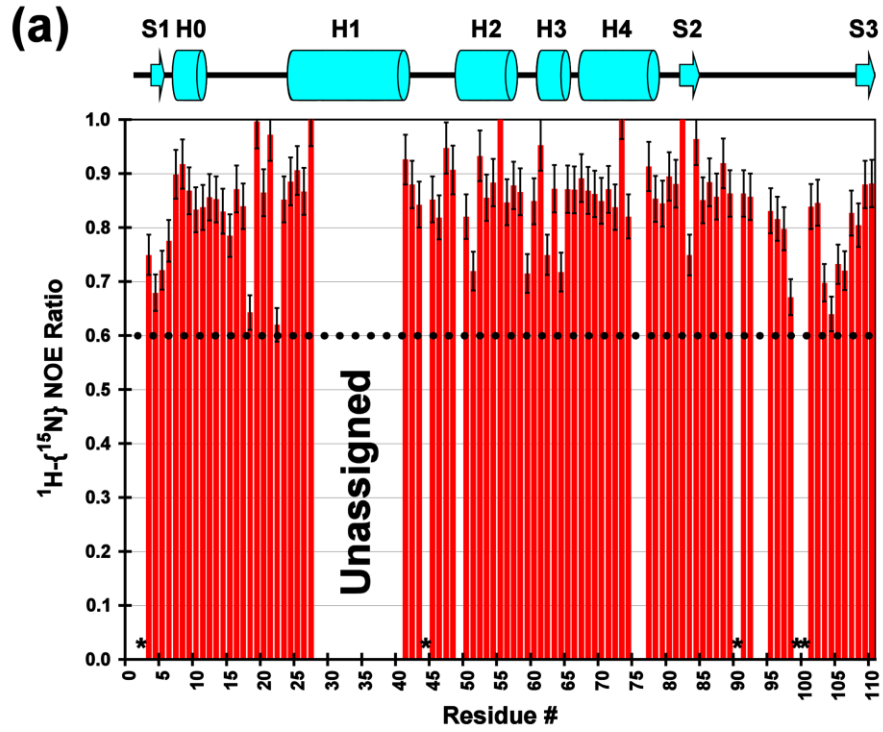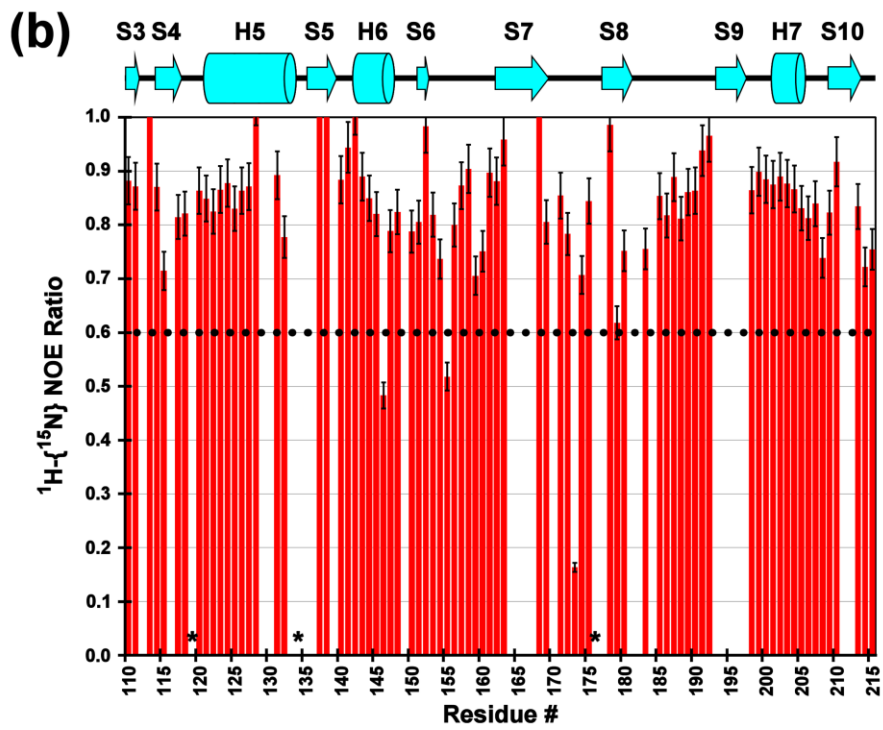

**Figure S4:** Backbone dynamics data of K777-inhibited cruzain. Heteronuclear  $^1\text{H}\{-^{15}\text{N}\}$  NOE ratios of the cruzain backbone  $^{15}\text{N}/^1\text{H}$  amide resonances greater than 0.6 (dotted line) indicates a structurally stable protease-K777 complex. Residue numbers **(a)** 1-110 and **(b)** 110-215 and the secondary structure motifs correspond to those of the cruzain-K777 crystal structure, 2OZ2.<sup>7</sup> Asterisks denote the positions of proline residues. Other blank regions indicate unassigned residues of the uniformly  $^{13}\text{C}/^{15}\text{N}/^2\text{H}$  labeled cruzain-K777 sample.

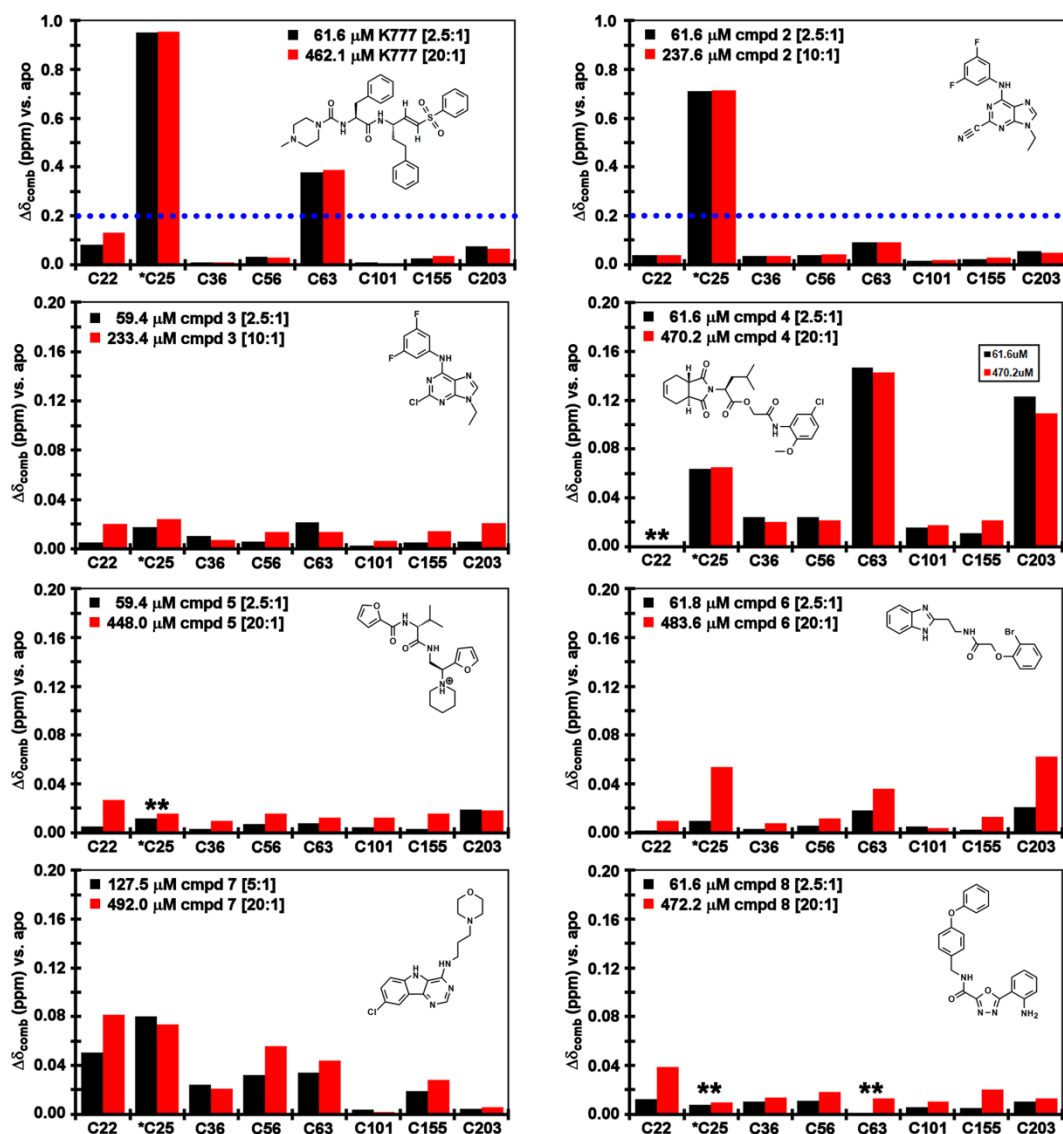

**Figure S5:** Summary of the cruzain-inhibitor  $^{15}\text{N}$ -Cys shift perturbation data. Chemical shift perturbations of the backbone amide  $^{15}\text{N}$ -Cys resonances upon addition of inhibitors listed in **Table 1** (as indicated) at 2.5 (black) and 10 or 20-fold molar equivalents of cruzain. The chemical structures of K777 and compounds **2** – **8** are indicated as insets. Single asterisks indicate the catalytic Cys25. Double asterisks signify peaks that display extensive peak broadening upon addition of the inhibitors. Note that the scale of the y-axis ranges from 0 - 1.0 ppm in the K777 and compound **2** bar charts and 0 - 0.2 ppm for compounds **3** – **8**, indicating larger shift perturbations for the covalently-bound inhibitors. The blue dotted line in the bar charts of K777 and compound **2** indicate the upper limit of the y-axis for the bar charts of compounds **3** – **8**.

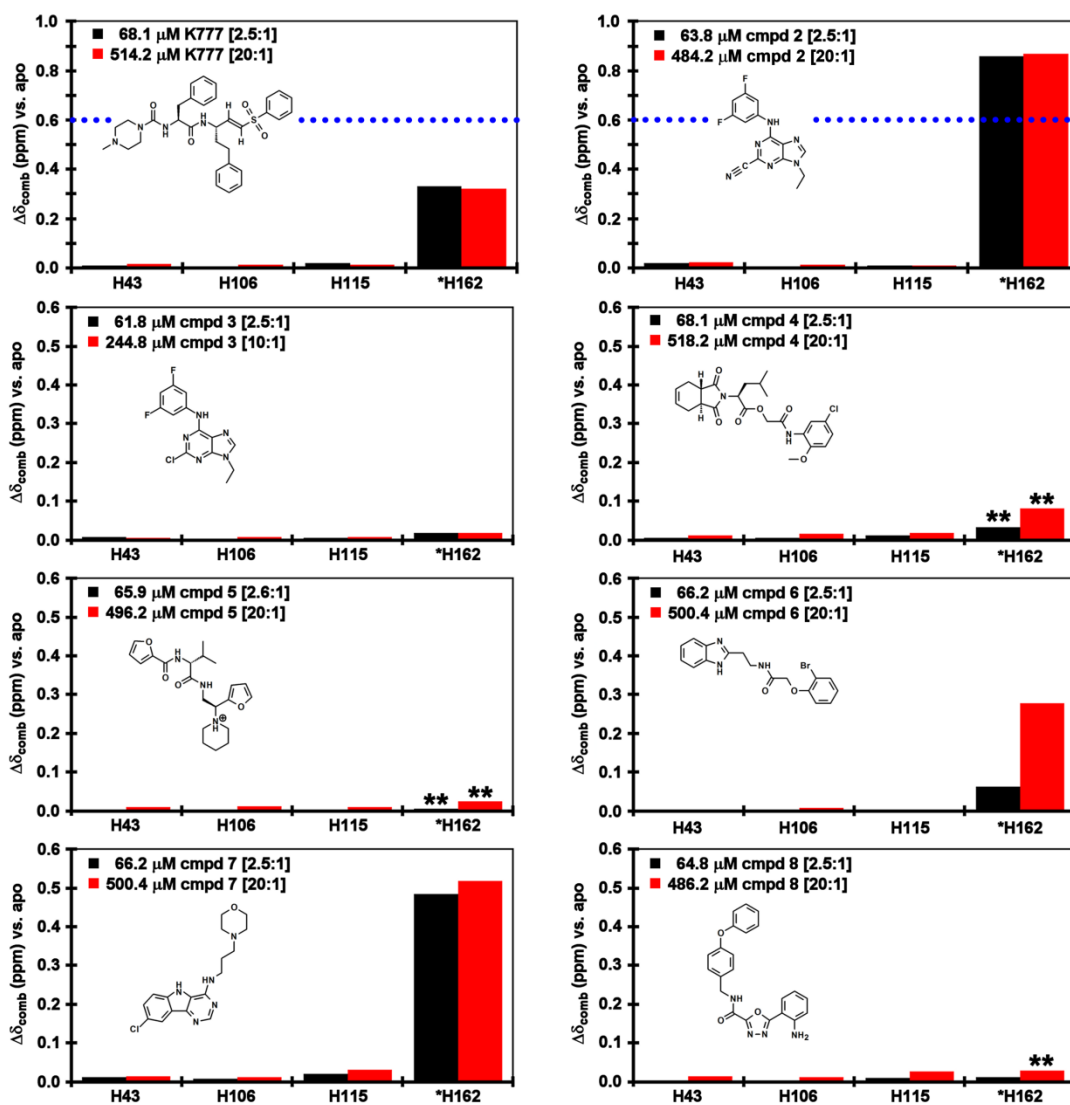

**Figure S6:** Summary of the cruzain-inhibitor  $^{15}\text{N}$ -His shift perturbation data. Chemical shift perturbations of the backbone amide  $^{15}\text{N}$ -His resonances upon addition of inhibitors listed in **Table 1** (as indicated) at 2.5 (black) and 10 or 20-fold molar equivalents of cruzain. The chemical structures of K777 and compounds **2-8** are indicated as insets. Single asterisks indicate the catalytic His162. Double asterisks signify peaks that display extensive peak broadening upon addition of the inhibitors. Note that the scale of the y-axis ranges from 0 - 1.0 ppm in the K777 and compound **2** bar charts and 0 - 0.6 ppm for compounds **3 - 8**, indicating larger shift perturbations for the covalently-bound inhibitors. The blue dotted line in the bar charts of K777 and compound **2** indicate the upper limit of the y-axis for the bar charts of compounds **3 - 8**.



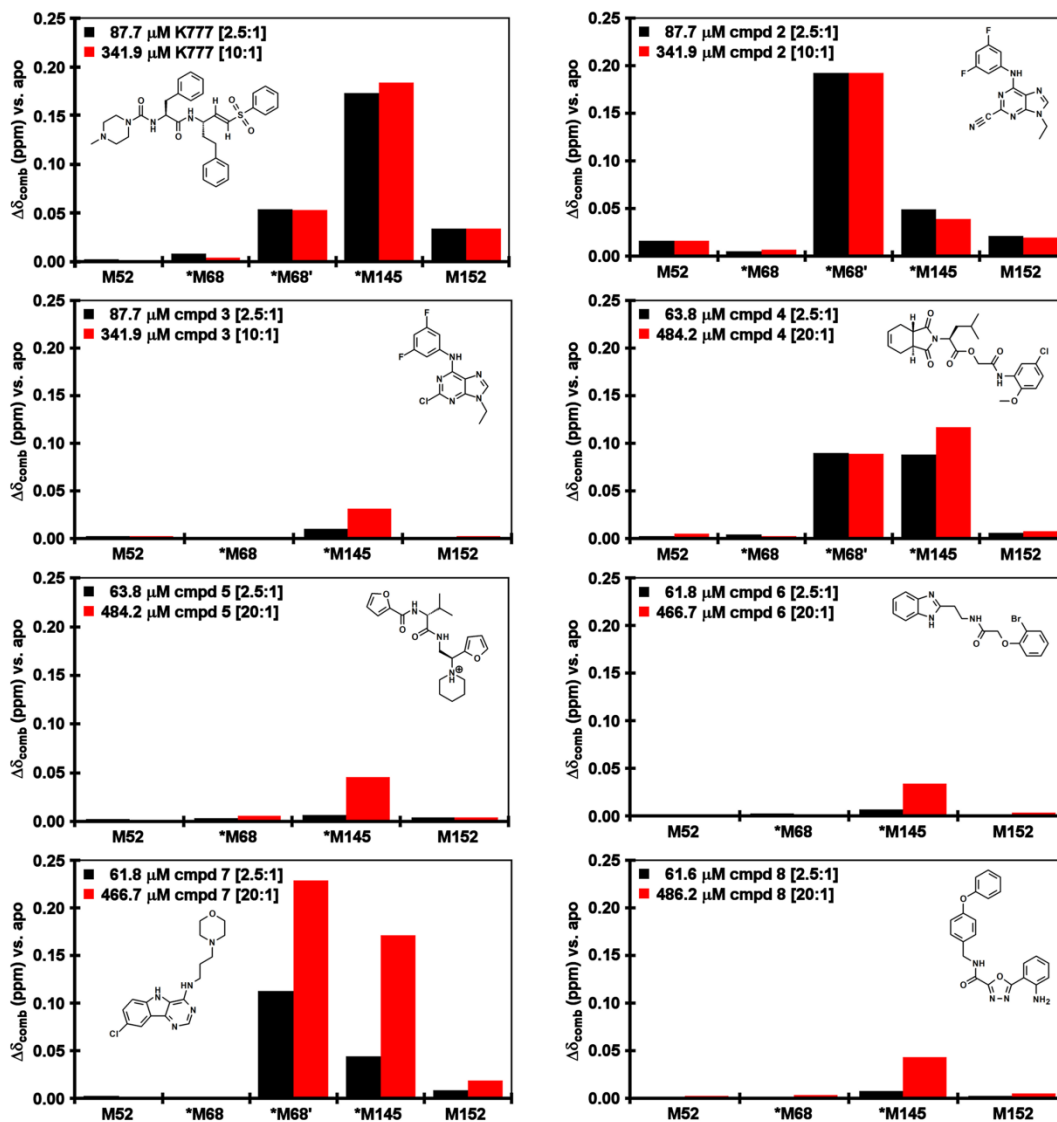

**Figure S7:** Summary of the cruzain-inhibitor  $^{13}\text{C}$ -Met shift perturbation data. Chemical shift perturbations of the backbone amide  $^{13}\text{C}$ -Met resonances upon addition of inhibitors listed in **Table 1** (as indicated) at 2.5 (black) and 10 or 20-fold (red) molar equivalents of cruzain. The chemical structures of K777 and compounds **2-8** are indicated as insets. Single asterisks indicate Met68, Met68', and Met145, which are positioned in the substrate binding pocket. Double asterisks signify peaks that display extensive peak broadening upon addition of the inhibitors.

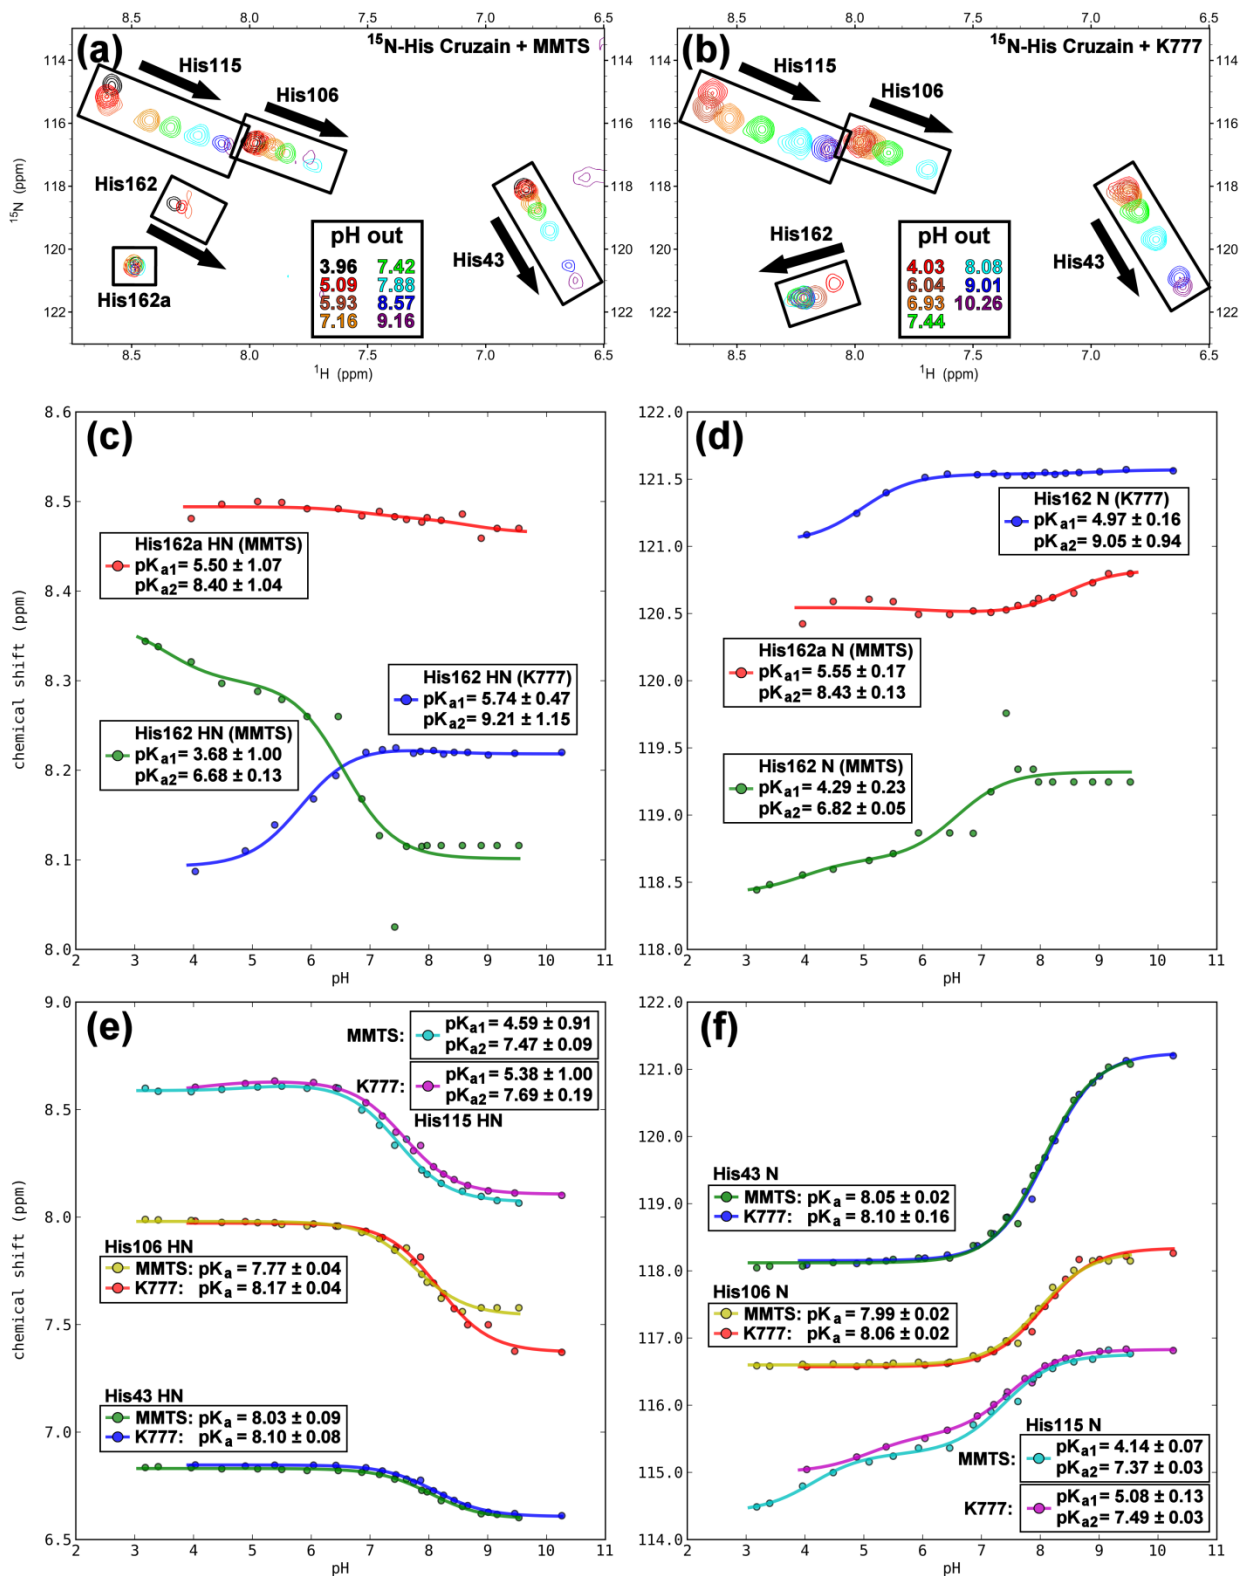

**Figure S8** Comparison of the pH titration curves of MMTS- and K777-inhibited  $^{15}\text{N}$ -His cruzain. Overlays of the  $^{15}\text{N}$ - $^1\text{H}$  HSQC spectra of (a) MMTS- and (b) K777-inhibited  $^{15}\text{N}$ -His labeled cruzain. (c) Amide proton and (d) amide nitrogen pH titration curves corresponding to His162 of cruzain inhibited with MMTS (green) or K777 (blue). A minor conformer, His162a (red), is observed in the MMTS-inhibited cruzain spectra. (e) Amide proton and (f) amide nitrogen pH titration curves of the non-catalytic histidine residues (colored as indicated), display no significant differences between the MMTS- and K777-inhibited states. Individual amide proton and nitrogen  $\text{pK}_a$  values are reported in the boxes. Overall apparent  $\text{pK}_a$  values, representing the average values determined from the amide proton and nitrogen curve fittings are listed in **Supplemental Table S2**.

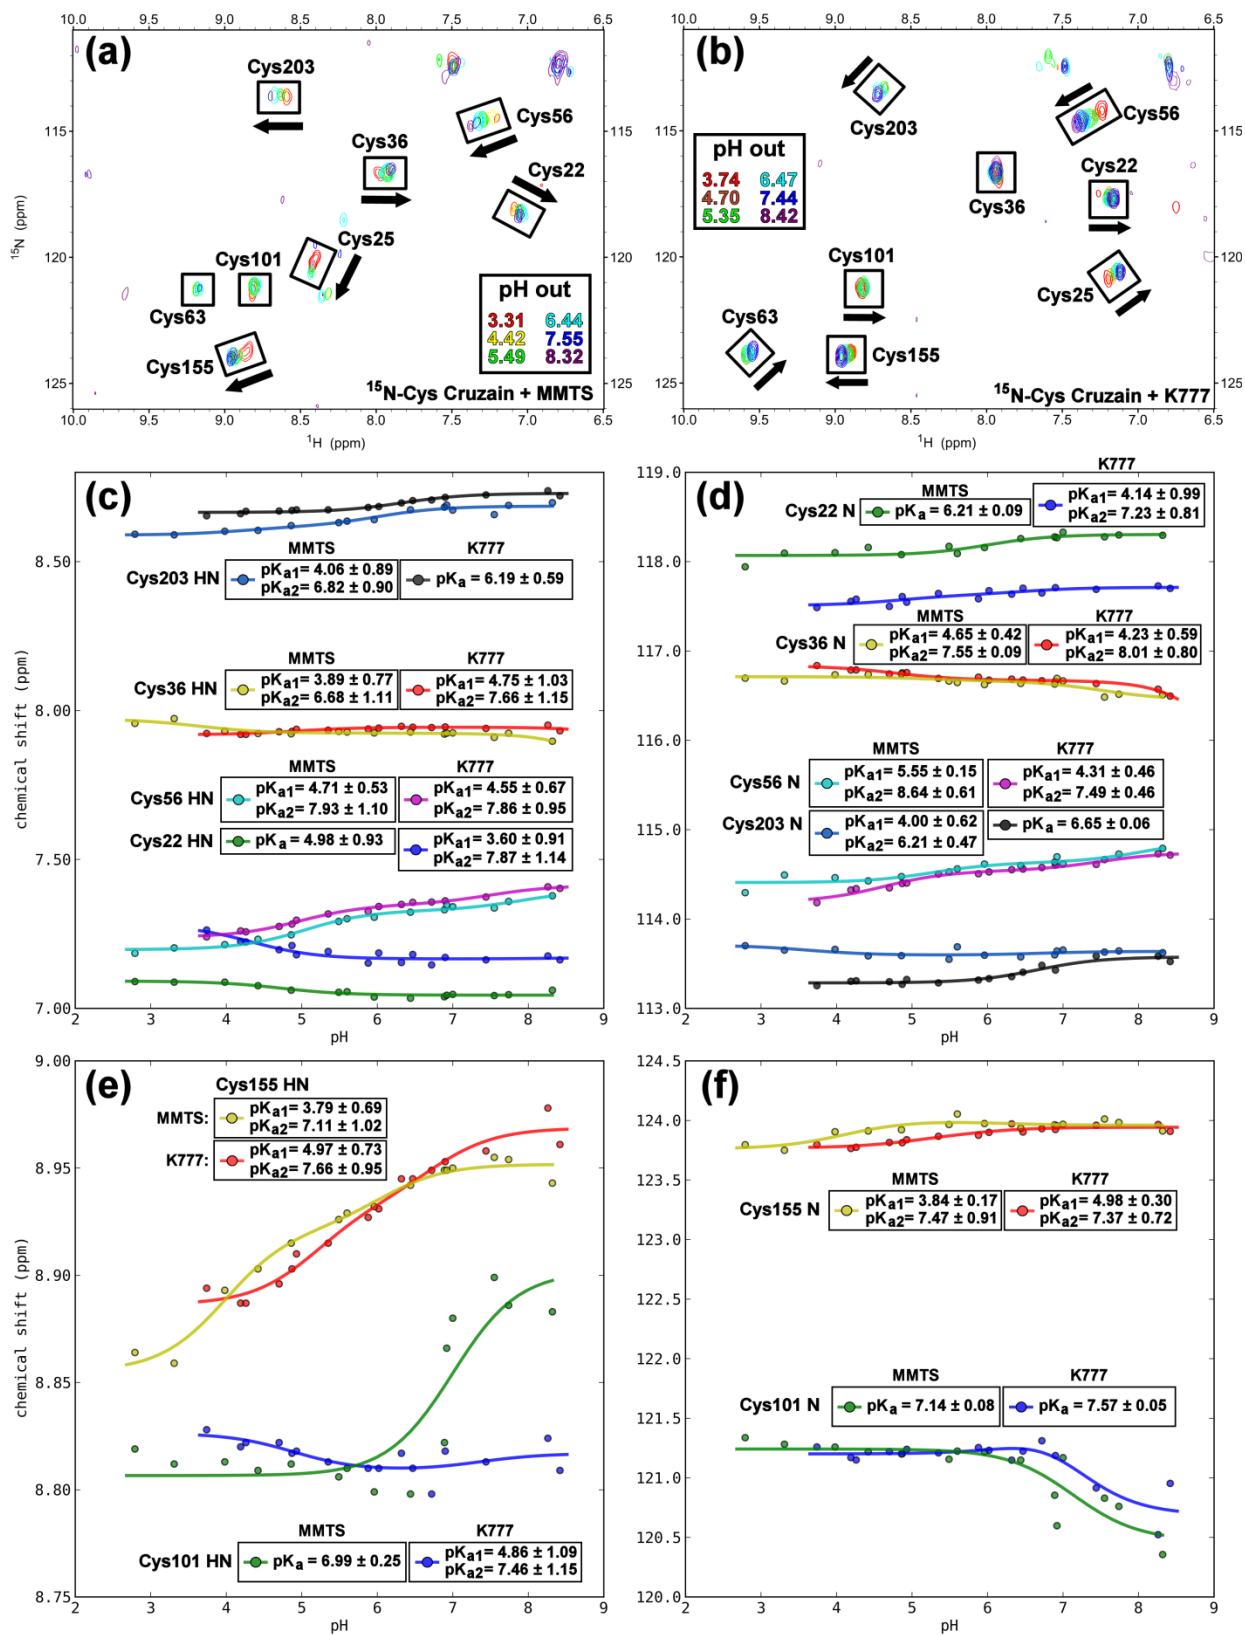

**Figure S9:** Comparison of NMR-based pH titration curves of MMTS- and K777-inhibited  $^{15}\text{N}$ -Cys cruzain (part 1). Overlays of the  $^{15}\text{N}$ - $^1\text{H}$  HSQC spectra of (a) MMTS- and (b) K777-inhibited  $^{15}\text{N}$ -Cys labeled cruzain. (c) Amide proton and (d) amide nitrogen pH titration curves of Cys22, Cys36, Cys56 and Cys203 (colored as indicated) from MMTS- and K777-inhibited cruzain. (e) Amide proton and (f) amide nitrogen pH titration curves of Cys101 and Cys155 (colored as indicated) from MMTS- and K777-inhibited cruzain. Individual “ $\text{pK}_a$ ” values of the amide proton and amide nitrogen are indicated in the boxes. Average “ $\text{pK}_a$ ” values with propagated errors are listed in **Supplementary Table S2**. pH titration curves for the Cys25 and Cys63 backbone amides are displayed in **Supplementary Figure S10**.

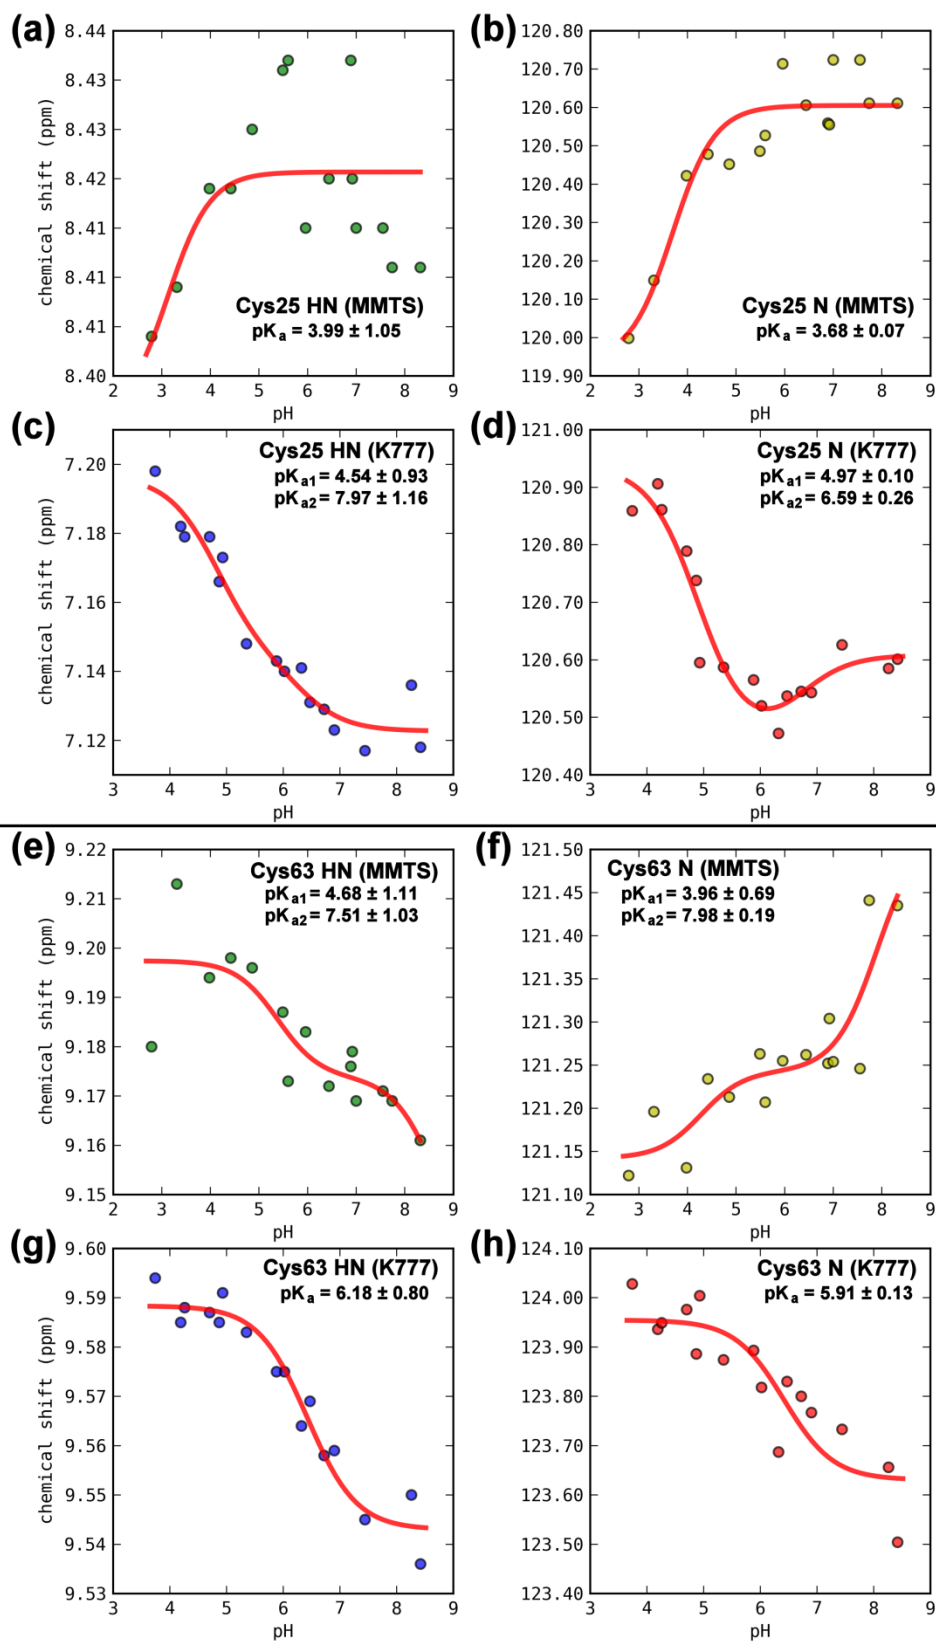

**Figure S10:** Comparison of NMR-based pH titration curves of MMTS- and K777-inhibited  $^{15}\text{N}$ -Cys cruzain (part 2). pH titration curves of Cys25 amide proton and nitrogen from the **(a-b)** cruzain-MMTS complex and **(c-d)** cruzain-K777 complex. pH titration curves of Cys63 amide proton and nitrogen from the **(e-f)** cruzain-MMTS complex and **(g-h)** cruzain-K777 complex. Estimated  $\text{pK}_a$  values were calculated with either a 1  $\text{pK}_a$  or 2  $\text{pK}_a$  fitting model using the Ekin module of PEAT\_DB.<sup>4</sup> Individual “ $\text{pK}_a$ ” values of the amide proton and amide nitrogen are indicated. Average “ $\text{pK}_a$ ” values with propagated errors are listed in **Supplementary Table S2**.

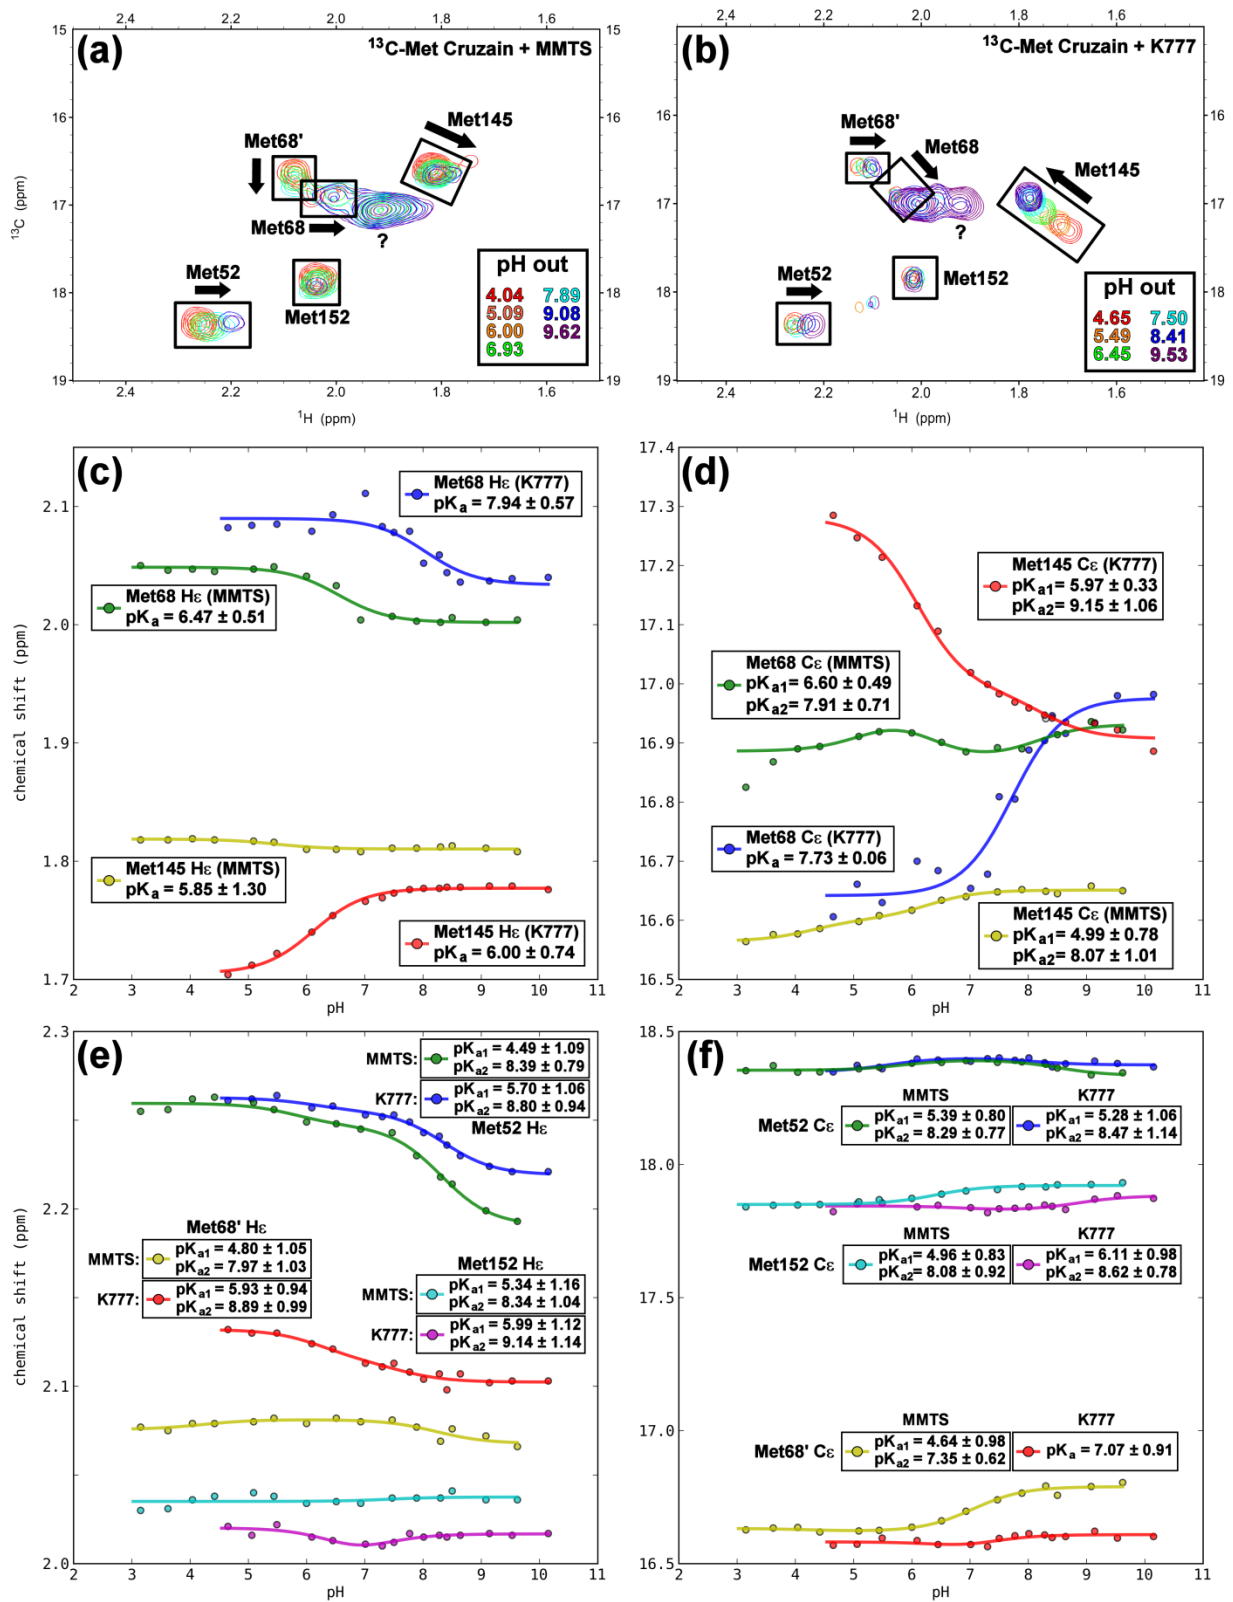



**Figure S11:** Comparison of NMR-based pH titration curves of MMTS- and K777-inhibited  $^{13}\text{C}$ -Met cruzain. Overlays of the  $^{13}\text{C}$ - $^1\text{H}$  HSQC spectra of (a) MMTS- and (b) K777-inhibited  $^{13}\text{C}$ -Met labeled cruzain. Titration points are colored as indicated, and range from pH  $\sim 3$  to  $\sim 10$ . The pH titration curves of the methionine  $\epsilon$ -methyl (c) proton and (d) carbon of Met68 and Met145 in the MMTS- and K777-inhibited states (colored as indicated). Both Met68 and Met145 are surface exposed in the substrate binding pocket. For clarity, a minor conformer, Met68', is plotted in (e) and (f), below. The pH titration curves of the “non-catalytic” methionine residue  $\epsilon$ -methyl (e) proton and (f) carbon in the MMTS- and K777-inhibited states (colored as indicated). Individual “ $\text{pK}_a$ ” values of the methyl proton and methyl carbon are indicated in the boxes. Average “ $\text{pK}_a$ ” values with propagated errors are listed in **Supplementary Table S2**.

**Table S1: U-<sup>13</sup>C/<sup>15</sup>N/<sup>2</sup>H-cruzain + K777 resonance assignments**  
<sup>a</sup>(Major conformer, 800 MHz, 27 °C)

| Residue #  | Residue #       |                 | Chemical Shift (ppm) |                |                |                |                | <sup>d</sup> Others                                                      |
|------------|-----------------|-----------------|----------------------|----------------|----------------|----------------|----------------|--------------------------------------------------------------------------|
|            | <sup>b</sup> SN | <sup>c</sup> CN | N                    | H <sup>N</sup> | C <sup>α</sup> | C <sup>β</sup> | C <sup>γ</sup> |                                                                          |
| Ala        | 1               | 1               |                      |                |                |                |                |                                                                          |
| Pro        | 2               | 2               |                      | ---            | 61.84          | 31.11          | 177.2          | C <sup>γ</sup> : 26.69                                                   |
| Ala        | 3               | 3               | 126.5                | 8.91           | 54.06          | 17.73          | 175.2          | C <sup>γ</sup> 1/γ2: 21.27, 19.80                                        |
| Ala        | 4               | 4               | 114.2                | 7.19           | 51.17          | 19.99          | 175.4          |                                                                          |
| Val        | 5               | 5               | 119.5                | 7.50           | 60.79          | 35.25          | 173.2          |                                                                          |
| Asp        | 6               | 6               | 123.0                | 8.21           | 52.84          | 40.09          | 177.3          |                                                                          |
| Trp        | 7               | 7               | 123.6                | 8.68           | 60.50          | 28.23          | 178.4          | Nε1: 126.0; Hε1: 9.82                                                    |
| Arg        | 8               | 8               | 118.8                | 8.62           | 58.11          | 28.65          | 180.5          | C <sup>γ</sup> : 24.30; Cδ: 42.26;<br>Cζ: 159.2;<br>Nε: 81.66; Hε: 8.21  |
| Ala        | 9               | 9               | 120.2                | 7.20           | 53.25          | 17.16          | 178.1          |                                                                          |
| Arg        | 10              | 10              | 114.2                | 6.88           | 54.01          | 29.98          | 176.2          | C <sup>γ</sup> : 25.40; Cδ: 41.73;<br>Cζ: 159.3<br>Nε: 82.92; Hε: 7.23   |
|            |                 |                 |                      |                |                |                |                |                                                                          |
| Gly        | 11              | 11              | 106.6                | 7.60           | 45.35          | ---            | 172.9          |                                                                          |
| Ala        | 12              | 12              | 113.5                | 6.68           | 51.25          | 21.16          | 173.9          |                                                                          |
| Val        | 13              | 13              | 114.5                | 7.64           | 60.87          | 33.57          | 176.3          | C <sup>γ</sup> 1/γ2: 21.10, 20.22                                        |
| Thr        | 14              | 14              | 117.5                | 8.14           | 61.51          | 70.48          | 175.5          | C <sup>γ</sup> 2: 20.66                                                  |
| Ala        | 15              | 15              | 121.9                | 8.43           | 52.22          | 18.30          | 177.8          |                                                                          |
| Val        | 16              | 16              | 121.8                | 8.35           | 63.46          | 31.15          | 176.0          | C <sup>γ</sup> 1/γ2: 20.65, 20.65                                        |
| Lys        | 17              | 17              | 130.5                | 9.43           | 55.14          | 34.73          | 173.5          | C <sup>γ</sup> /Cδ: 25.27; Cε: 41.11                                     |
| Asp        | 18              | 18              | 113.8                | 7.12           | 51.30          | 42.92          | 176.0          |                                                                          |
| <b>Gln</b> | <b>19</b>       | <b>19</b>       | <b>123.2</b>         | <b>8.09</b>    | <b>55.78</b>   | <b>29.44</b>   | <b>178.7</b>   | <b>C<sup>γ</sup>: 32.92</b>                                              |
| Gly        | 20              | 20              | 111.4                | 8.68           | 45.84          | ---            | 174.8          |                                                                          |
|            |                 |                 |                      |                |                |                |                |                                                                          |
| Gln        | 21              | 21              | 123.2                | 8.88           | 54.65          | 27.13          | 174.5          | C <sup>γ</sup> : 33.41; Cδ: 180.4<br>Nε2: 112.2;<br>Hε21/ε22: 7.51, 6.73 |
| Cys        | 22              | 22              | 117.2                | 7.07           | 54.68          | 45.55          | 174.9          |                                                                          |
| Gly        | 23              | 23              | 121.1                | 8.62           | 47.87          | ---            | 174.3          |                                                                          |
| Ser        | 24              | 24              | 111.9                | 8.69           | 55.87          | 62.12          | 176.0          |                                                                          |
| <b>Cys</b> | <b>25</b>       | <b>25</b>       | <b>120.4</b>         | <b>7.14</b>    | <b>59.26</b>   | <b>35.42</b>   | <b>172.4</b>   |                                                                          |
| Trp        | 26              | 26              | 120.8                | 7.11           | 56.46          | 27.12          | 174.6          |                                                                          |
| Ala        | 27              | 27              | 124.9                | 5.98           | 53.05          | 16.40          |                |                                                                          |
| Phe        | 28              | 28              |                      |                |                |                |                |                                                                          |
| Ser        | 29              | 29              |                      |                |                |                |                |                                                                          |
| Ala        | 30              | 30              |                      |                |                |                |                |                                                                          |
|            |                 |                 |                      |                |                |                |                |                                                                          |
| Ile        | 31              | 31              |                      |                |                |                |                |                                                                          |
| Gly        | 32              | 32              |                      |                |                |                |                |                                                                          |
| Asn        | 33              | 33              |                      |                |                |                |                |                                                                          |
| Val        | 34              | 34              |                      |                |                |                |                |                                                                          |

| Residue #        | Residue #       |                 | Chemical Shift (ppm) |                |                |                |                | Others                                                                   |
|------------------|-----------------|-----------------|----------------------|----------------|----------------|----------------|----------------|--------------------------------------------------------------------------|
|                  | <sup>b</sup> SN | <sup>c</sup> CN | N                    | H <sup>N</sup> | C <sup>α</sup> | C <sup>β</sup> | C <sup>γ</sup> |                                                                          |
| Glu              | 35              | 35              | 116.9                | 7.91           |                |                |                |                                                                          |
| <sup>e</sup> Cys | 36              | 36              |                      |                |                |                |                |                                                                          |
| Gln              | 37              | 37              |                      |                |                |                |                |                                                                          |
| Trp              | 38              | 38              |                      |                |                |                |                |                                                                          |
| Phe              | 39              | 39              |                      |                |                |                |                |                                                                          |
| Leu              | 40              | 40              |                      |                | 56.28          | 39.82          | 177.3          |                                                                          |
| Ala              | 41              | 41              | 121.0                | 7.34           | 51.51          | 17.76          | 175.9          |                                                                          |
| Gly              | 42              | 42              | 106.2                | 7.71           | 44.70          | ---            | 172.9          |                                                                          |
| His              | 43              | 43              | 118.0                | 6.84           | 52.18          | 27.64          |                |                                                                          |
| Pro              | 44              | 44              |                      | ---            | 62.55          | 31.09          | 177.2          |                                                                          |
| Leu              | 45              | 45              | 124.9                | 9.08           | 56.96          | 39.98          | 176.8          |                                                                          |
| Thr              | 46              | 46              | 127.4                | 9.45           | 61.50          | 71.67          | 172.5          | C <sub>γ</sub> 2: 19.07                                                  |
| Asn              | 47              | 47              | 125.5                | 9.03           | 52.96          | 37.65          | 176.2          | C <sub>γ</sub> : 176.3; Nδ2: 112.80<br>Hδ21/δ22: 7.74, 6.95              |
| Leu              | 48              | 48              | 131.3                | 10.98          | 53.95          | 42.17          |                |                                                                          |
| Ser              | 49              | 49              |                      |                | 57.03          | 62.82          | 174.4          |                                                                          |
| Glu              | 50              | 50              | 126.0                | 8.10           | 61.03          | 27.65          | 180.3          | C <sub>γ</sub> : 34.67                                                   |
| Gln              | 51              | 51              | 121.2                | 9.44           | 56.90          | 28.27          | 175.8          | C <sub>γ</sub> : 33.48                                                   |
| Met              | 52              | 52              | 115.6                | 7.41           | 58.22          | 31.75          | 177.4          | C <sub>γ</sub> : 30.51;<br>C <sub>ε</sub> : 18.47; H <sub>ε</sub> : 2.26 |
| Leu              | 53              | 53              | 114.3                | 6.35           | 55.73          | 41.21          | 178.3          | C <sub>γ</sub> : 25.28                                                   |
| Val              | 54              | 54              | 118.7                | 7.84           | 66.90          | 30.63          | 177.8          | C <sub>γ</sub> 1/γ2: 22.63, 20.68                                        |
| Ser              | 55              | 55              | 109.6                | 8.69           | 62.37          | 64.05          | 175.3          |                                                                          |
| Cys              | 56              | 56              | 114.3                | 7.31           | 55.87          | 45.56          | 173.7          |                                                                          |
| Asp              | 57              | 57              | 116.1                | 7.15           | 51.11          | 37.31          | 176.4          |                                                                          |
| Lys              | 58              | 58              | 125.1                | 7.33           | 55.67          | 29.55          | 177.4          | C <sub>γ</sub> : 23.14; C <sub>δ</sub> : 27.17                           |
| Thr              | 59              | 59              | 113.6                | 8.19           | 62.69          | 68.07          | 173.7          | C <sub>γ</sub> 2: 21.81                                                  |
| Asp              | 60              | 60              | 121.8                | 6.86           | 53.25          | 42.19          | 173.3          |                                                                          |
| Ser              | 61              | 61              | 111.3                | 7.56           | 56.17          | 62.74          | 176.8          |                                                                          |
| Gly              | 62              | 62              | 111.0                | 8.61           | 48.10          | ---            | 176.2          |                                                                          |
| Cys              | 63              | 63              | 123.6                | 9.56           | 54.84          | 39.38          | 175.5          |                                                                          |
| Ser              | 64              | 64              | 114.7                | 8.79           | 58.05          | 62.14          | 172.7          |                                                                          |
| Gly              | 65              | 65              | 106.5                | 7.01           | 44.24          | ---            | 171.9          |                                                                          |
| Gly              | 66              | 66              | 105.0                | 7.96           | 44.48          | ---            | 170.5          |                                                                          |
| Leu              | 67              | 67              | 117.5                | 7.59           | 53.03          | 43.62          | 176.0          | Cδ1/δ2: 25.27, 22.31                                                     |
| Met              | 68              | 68              | 125.5                | 8.57           | 63.40          | 26.95          | 176.1          | C <sub>γ</sub> : 33.55<br>C <sub>ε</sub> : 16.88; H <sub>ε</sub> : 2.13  |
| Asn              | 69              | 69              | 114.4                | 9.03           | 55.84          | 36.57          | 177.8          | C <sub>γ</sub> : 175.2; Nδ2: 112.4<br>Hδ21/δ22: 7.32, 7.27               |
| Asn              | 70              | 70              | 116.9                | 6.26           | 54.61          | 37.39          | 177.7          | C <sub>γ</sub> : 176.6; Nδ2: 109.6<br>Hδ21/δ22: 6.73, 6.69               |
| Ala              | 71              | 71              | 125.4                | 7.71           | 54.51          | 17.08          | 179.8          |                                                                          |

| Residue # | Residue #       |                 | Chemical Shift (ppm) |                |                |                |                | Others                                                                                                          |
|-----------|-----------------|-----------------|----------------------|----------------|----------------|----------------|----------------|-----------------------------------------------------------------------------------------------------------------|
|           | <sup>b</sup> SN | <sup>c</sup> CN | N                    | H <sup>N</sup> | C <sup>α</sup> | C <sup>β</sup> | C <sup>γ</sup> |                                                                                                                 |
| Phe       | 72              | 72              | 113.8                | 8.07           | 58.45          | 37.65          | 179.2          |                                                                                                                 |
| Glu       | 73              | 73              | 118.6                | 7.58           | 58.69          | 27.89          | 177.3          | C <sub>γ</sub> : 34.65                                                                                          |
| Trp       | 74              | 74              | 122.2                | 8.92           | 62.74          | 25.32          |                | N <sub>ε</sub> 1: 131.5; H <sub>ε</sub> 1: 10.47                                                                |
| Ile       | 75              | 75              |                      |                |                |                |                |                                                                                                                 |
| Val       | 76              | 76              |                      |                | 66.67          | 31.83          | 176.8          | C <sub>γ</sub> : 21.88, 20.20                                                                                   |
| Gln       | 77              | 77              | 115.6                | 8.97           | 57.77          | 28.24          | 178.1          | C <sub>γ</sub> : 35.13, C <sub>δ</sub> : 179.0<br>N <sub>ε</sub> 2: 111.8;<br>H <sub>ε</sub> 21/ε22: 7.59, 6.85 |
| Glu       | 78              | 78              | 114.4                | 8.20           | 55.27          | 28.48          | 176.6          | C <sub>γ</sub> : 35.13                                                                                          |
| Asn       | 79              | 78a             | 118.2                | 6.59           | 51.12          | 41.58          | 177.2          |                                                                                                                 |
| Asn       | 80              | 78b             | 115.7                | 8.02           | 54.53          | 37.02          | 174.6          | C <sub>γ</sub> : 178.3; N <sub>δ</sub> 2: 113.0<br>H <sub>δ</sub> 21/δ22: 7.47, 6.78                            |
| Gly       | 81              | 78c             | 105.8                | 8.75           | 45.76          | ---            |                |                                                                                                                 |
| Ala       | 82              | 79              | 120.9                | 7.48           | 52.56          | 19.56          | 176.3          |                                                                                                                 |
| Val       | 83              | 80              | 117.2                | 8.27           | 60.40          | 32.23          | 176.3          |                                                                                                                 |
| Tyr       | 84              | 81              | 126.0                | 6.82           | 57.22          | 38.15          | 174.7          |                                                                                                                 |
| Thr       | 85              | 82              | 108.9                | 8.69           | 60.96          | 68.63          | 174.6          | C <sub>γ</sub> 2: 21.65                                                                                         |
| Glu       | 86              | 83              | 125.0                | 8.69           | 58.55          | 28.75          | 178.5          | C <sub>γ</sub> : 34.86                                                                                          |
| Asp       | 87              | 84              | 113.3                | 8.52           | 56.21          | 39.95          | 177.4          |                                                                                                                 |
| Ser       | 88              | 85              | 109.8                | 7.49           | 58.10          | 64.53          | 175.2          |                                                                                                                 |
| Tyr       | 89              | 86              | 127.7                | 7.84           | 54.15          | 35.37          |                |                                                                                                                 |
| Pro       | 90              | 87              |                      | ---            | 63.05          | 32.35          | 176.4          | C <sub>γ</sub> : 26.03                                                                                          |
| Tyr       | 91              | 88              | 121.4                | 9.31           | 60.25          | 37.22          | 177.1          |                                                                                                                 |
| Ala       | 92              | 89              | 131.3                | 8.76           | 51.04          | 20.11          |                |                                                                                                                 |
| Ser       | 93              | 89a             |                      |                | 57.91          | 63.67          | 175.6          |                                                                                                                 |
| Gly       | 94              | 89b             | 109.5                | 8.69           | 47.09          | ---            | 175.7          |                                                                                                                 |
| Glu       | 95              | 89c             | 117.9                | 8.31           | 55.76          | 27.85          | 176.8          | C <sub>γ</sub> : 35.80                                                                                          |
| Gly       | 96              | 90              | 106.1                | 8.27           | 45.01          | ---            | 172.7          |                                                                                                                 |
| Ile       | 97              | 91              | 119.6                | 7.42           | 58.96          | 38.49          | 175.4          | C <sub>γ</sub> 1: 25.86; C <sub>δ</sub> 1: 16.47                                                                |
| Ser       | 98              | 92              | 122.1                | 8.72           | 53.87          | 63.38          |                |                                                                                                                 |
| Pro       | 99              | 93              |                      |                |                |                |                |                                                                                                                 |
| Pro       | 100             | 94              |                      | ---            | 62.15          | 31.18          | 176.3          | C <sub>γ</sub> : 26.27; C <sub>δ</sub> : 49.96                                                                  |
| Cys       | 101             | 95              | 120.9                | 8.80           | 57.15          | 41.69          | 174.6          |                                                                                                                 |
| Thr       | 102             | 96              | 121.0                | 7.90           | 58.66          | 70.38          | 175.5          | C <sub>γ</sub> 2: 21.21                                                                                         |
| Thr       | 103             | 97              | 114.1                | 8.60           | 61.68          | 68.58          | 174.7          | C <sub>γ</sub> 2: 21.23                                                                                         |
| Ser       | 104             | 98              | 116.0                | 7.52           | 56.90          | 64.03          | 173.7          |                                                                                                                 |
| Gly       | 105             | 99              | 106.9                | 8.42           | 45.14          | ---            | 173.9          |                                                                                                                 |
| His       | 106             | 100             | 116.5                | 7.99           | 51.83          | 27.75          | 172.6          |                                                                                                                 |
| Thr       | 107             | 101             | 117.6                | 8.98           | 61.43          | 70.89          | 174.1          | C <sub>γ</sub> 2: 20.73                                                                                         |
| Val       | 108             | 102             | 129.4                | 9.38           | 65.73          | 30.96          | 175.2          | C <sub>γ</sub> 1/γ2: 21.85, 20.64                                                                               |
| Gly       | 109             | 103             | 115.5                | 9.15           | 45.13          | ---            | 170.3          |                                                                                                                 |
| Ala       | 110             | 105             | 119.2                | 7.32           | 49.94          | 21.79          | 173.8          |                                                                                                                 |

| Residue # | Residue #       |                 | Chemical Shift (ppm) |                |                |                |                |                                                                                                                  |
|-----------|-----------------|-----------------|----------------------|----------------|----------------|----------------|----------------|------------------------------------------------------------------------------------------------------------------|
|           | <sup>b</sup> SN | <sup>c</sup> CN | N                    | H <sup>N</sup> | C <sup>α</sup> | C <sup>β</sup> | C <sup>γ</sup> | Others                                                                                                           |
| Thr       | 111             | 106             | 111.8                | 5.90           | 59.41          | 71.01          |                |                                                                                                                  |
| Ile       | 112             | 107             |                      |                | 58.53          | 40.04          | 175.6          |                                                                                                                  |
| Thr       | 113             | 108             | 107.9                | 8.79           | 60.39          | 69.31          | 175.0          | C <sub>γ</sub> 2: 20.68                                                                                          |
| Gly       | 114             | 109             | 107.8                | 7.45           | 45.21          | ---            | 171.6          |                                                                                                                  |
| His       | 115             | 110             | 115.1                | 8.64           | 55.10          | 30.61          |                |                                                                                                                  |
| Val       | 116             | 111             |                      |                | 58.55          | 34.05          | 173.9          | C <sub>γ</sub> 1/γ2: 19.47, 18.25                                                                                |
| Glu       | 117             | 112             | 124.2                | 8.40           | 54.83          | 28.24          | 175.7          | C <sub>γ</sub> : 35.13                                                                                           |
| Leu       | 118             | 113             | 125.5                | 8.32           | 52.77          | 39.43          |                |                                                                                                                  |
| Pro       | 119             | 114             |                      | ---            | 61.66          | 32.08          | 176.3          | C <sub>γ</sub> : 27.01; C <sub>δ</sub> : 49.83                                                                   |
| Gln       | 120             | 115             | 119.0                | 8.26           | 52.86          | 25.88          | 176.5          | C <sub>γ</sub> : 32.74; C <sub>δ</sub> : 181.50<br>N <sub>ε</sub> 2: 115.30<br>H <sub>ε</sub> 21/ε22: 8.42, 6.85 |
| Asp       | 121             | 116             | 121.3                | 7.92           | 53.39          | 43.19          | 176.2          |                                                                                                                  |
| Glu       | 122             | 117             | 125.8                | 9.69           | 61.64          | 31.12          | 177.2          | C <sub>γ</sub> : 40.56                                                                                           |
| Ala       | 123             | 118             | 121.2                | 8.25           | 54.70          | 17.11          | 181.5          |                                                                                                                  |
| Gln       | 124             | 119             | 118.7                | 8.25           | 58.61          | 28.25          | 180.0          | C <sub>γ</sub> : 33.90                                                                                           |
| Ile       | 125             | 120             | 122.1                | 8.63           | 65.80          | 37.58          | 177.4          |                                                                                                                  |
| Ala       | 126             | 121             | 121.6                | 8.37           | 55.60          | 17.02          | 178.4          |                                                                                                                  |
| Ala       | 127             | 122             | 117.7                | 7.86           | 54.58          | 17.35          | 180.4          |                                                                                                                  |
| Trp       | 128             | 123             | 119.8                | 8.14           | 61.53          |                |                |                                                                                                                  |
| Leu       | 129             | 124             |                      |                |                |                |                |                                                                                                                  |
| Ala       | 130             | 125             |                      |                | 55.19          | 17.79          | 177.0          |                                                                                                                  |
| Val       | 131             | 126             | 110.8                | 6.95           | 62.69          | 33.44          | 176.5          | C <sub>γ</sub> 1/γ2: 20.07, 20.07                                                                                |
| Asn       | 132             | 127             | 114.8                | 8.70           | 53.14          | 37.65          |                | C <sub>γ</sub> : 181.30; N <sub>δ</sub> 2: 109.20<br>H <sub>δ</sub> 21/δ22: 7.64, 7.15                           |
| Gly       | 133             | 128             |                      |                |                |                |                |                                                                                                                  |
| Pro       | 134             | 129             |                      |                |                |                |                |                                                                                                                  |
| Val       | 135             | 130             |                      |                |                |                |                |                                                                                                                  |
| Ala       | 136             | 131             |                      |                | 56.35          | 17.63          | 175.5          |                                                                                                                  |
| Val       | 137             | 132             | 111.7                | 7.71           | 58.61          | 34.09          | 173.5          |                                                                                                                  |
| Ala       | 138             | 133             | 124.9                | 7.16           | 48.62          | 22.46          |                |                                                                                                                  |
| Val       | 139             | 134             |                      |                | 57.50          | 35.93          | 173.2          | C <sub>γ</sub> 1/γ2: 20.77, 20.77                                                                                |
| Asp       | 140             | 135             | 120.3                | 8.36           | 53.47          | 41.22          | 176.1          |                                                                                                                  |
| Ala       | 141             | 136             | 128.5                | 9.32           | 49.36          | 20.02          | 178.7          |                                                                                                                  |
| Ser       | 142             | 139             | 122.2                | 9.36           | 61.48          | 62.66          | 177.4          |                                                                                                                  |
| Ser       | 143             | 140             | 115.9                | 9.24           | 59.14          | 64.24          | 175.9          |                                                                                                                  |
| Trp       | 144             | 141             | 121.4                | 8.50           | 58.78          | 28.73          | 178.6          |                                                                                                                  |
| Met       | 145             | 142             | 118.9                | 8.69           | 58.15          | 29.57          | 178.0          | C <sub>γ</sub> : 30.73,<br>C <sub>ε</sub> : 17.27; H <sub>ε</sub> : 1.65                                         |
| Thr       | 146             | 143             | 105.3                | 7.66           | 60.45          | 68.57          | 174.2          | C <sub>γ</sub> 2: 20.57                                                                                          |
| Tyr       | 147             | 144             | 123.1                | 7.50           | 58.60          | 38.08          | 175.7          |                                                                                                                  |
| Thr       | 148             | 145             | 117.4                | 8.40           | 59.90          | 68.91          |                |                                                                                                                  |
| Gly       | 149             | 146             |                      |                | 44.07          | ---            | 172.9          |                                                                                                                  |

| Residue #  | Residue #       |                 | Chemical Shift (ppm) |                |                |                |                |                                                                                                                |
|------------|-----------------|-----------------|----------------------|----------------|----------------|----------------|----------------|----------------------------------------------------------------------------------------------------------------|
|            | <sup>b</sup> SN | <sup>c</sup> CN | N                    | H <sup>N</sup> | C <sup>α</sup> | C <sup>β</sup> | C <sup>γ</sup> | Others                                                                                                         |
| Gly        | 150             | 147             | 108.3                | 8.86           | 42.89          | ---            | 173.4          |                                                                                                                |
| Val        | 151             | 148             | 119.3                | 8.41           | 61.30          | 30.53          | 175.8          | C <sub>γ1/γ2</sub> : 20.76, 20.76                                                                              |
| Met        | 152             | 149             | 129.8                | 8.85           | 56.92          | 33.46          | 175.8          | C <sub>γ</sub> : 31.51<br>C <sub>ε</sub> : 18.02; H <sub>ε</sub> : 2.02                                        |
| Thr        | 153             | 151             | 116.7                | 8.43           | 61.21          | 69.16          | 174.5          | C <sub>γ2</sub> : 21.24                                                                                        |
| Ser        | 154             | 152             | 117.2                | 7.67           | 55.77          | 62.38          | 173.6          |                                                                                                                |
| Cys        | 155             | 153             | 123.7                | 8.93           | 54.66          | 43.02          | 175.9          |                                                                                                                |
| Val        | 156             | 154             | 131.9                | 7.81           | 65.15          | 30.61          | 175.3          | C <sub>γ1/γ2</sub> : 21.15, 18.89                                                                              |
| Ser        | 157             | 155             | 126.1                | 9.03           | 55.59          | 63.28          | 172.5          |                                                                                                                |
| Glu        | 158             | 156             | 121.9                | 9.54           | 56.81          | 31.82          | 176.3          | C <sub>γ</sub> : 34.64                                                                                         |
| Gln        | 159             | 156a            | 121.3                | 9.21           | 54.44          | 30.61          | 173.6          | C <sub>γ</sub> : 32.69; C <sub>δ</sub> : 180.7<br>N <sub>ε2</sub> : 112.0<br>H <sub>ε21/ε22</sub> : 7.58, 6.79 |
| Leu        | 160             | 157             | 124.2                | 8.45           | 54.94          | 42.23          | 177.9          |                                                                                                                |
| Asp        | 161             | 158             | 119.7                | 8.91           | 53.14          | 40.28          | 175.0          |                                                                                                                |
| <b>His</b> | <b>162</b>      | <b>159</b>      | <b>121.4</b>         | <b>8.13</b>    | <b>54.60</b>   | <b>34.10</b>   | <b>172.8</b>   |                                                                                                                |
| Gly        | 163             | 160             | 110.8                | 6.83           | 43.97          | ---            |                |                                                                                                                |
| Val        | 164             | 161             |                      |                |                |                |                |                                                                                                                |
| Leu        | 165             | 162             |                      |                |                |                |                |                                                                                                                |
| Leu        | 166             | 163             |                      |                |                |                |                |                                                                                                                |
| Val        | 167             | 164             |                      |                | 60.33          | 32.27          | 178.1          |                                                                                                                |
| Gly        | 168             | 165             | 109.2                | 8.35           | 46.62          | ---            | 173.6          |                                                                                                                |
| Tyr        | 169             | 166             | 118.3                | 7.72           | 56.05          | 41.14          |                |                                                                                                                |
| Asn        | 170             | 167             |                      |                | 52.30          | 38.95          | 174.0          | C <sub>γ</sub> : 176.30; N <sub>δ2</sub> : 108.7<br>H <sub>δ21/δ22</sub> : 6.89, 6.83                          |
| Asp        | 171             | 167a            | 123.6                | 9.40           | 54.69          | 40.58          | 177.2          |                                                                                                                |
| Ser        | 172             | 167b            | 116.4                | 8.18           | 57.53          | 62.80          | 173.5          |                                                                                                                |
| Ala        | 173             | 167c            | 123.0                | 6.40           | 50.51          | 20.17          | 175.8          |                                                                                                                |
| Ala        | 174             | 167d            | 122.2                | 8.50           | 54.74          | 17.21          | 179.2          |                                                                                                                |
| Val        | 175             | 168             | 114.3                | 7.31           | 58.79          | 32.34          |                |                                                                                                                |
| Pro        | 176             | 169             |                      | ---            | 56.12          | 29.43          | 175.2          | C <sub>δ</sub> : 41.77                                                                                         |
| Tyr        | 177             | 170             | 129.3                | 7.40           | 56.94          | 39.95          | 173.3          |                                                                                                                |
| Trp        | 178             | 171             | 117.2                | 8.62           | 58.07          | 28.77          | 176.3          |                                                                                                                |
| Ile        | 179             | 172             | 128.0                | 8.61           | 61.01          | 37.60          | 180.0          |                                                                                                                |
| Ile        | 180             | 173             | 115.8                | 8.13           | 63.97          | 42.91          |                |                                                                                                                |
| Lys        | 181             | 174             |                      |                |                |                |                |                                                                                                                |
| <b>Asn</b> | <b>182</b>      | <b>175</b>      |                      |                | <b>48.86</b>   | <b>39.88</b>   | <b>173.1</b>   |                                                                                                                |
| Ser        | 183             | 176             | 110.6                | 7.41           | 55.87          | 61.00          |                |                                                                                                                |
| Trp        | 184             | 177             |                      |                | 52.23          | 28.16          | 177.8          |                                                                                                                |
| Thr        | 185             | 178             | 108.9                | 7.65           | 64.62          | 71.50          | 175.7          | C <sub>γ2</sub> : 20.71                                                                                        |
| Thr        | 186             | 179             | 107.9                | 8.48           | 62.79          | 68.53          | 174.8          | C <sub>γ2</sub> : 22.32                                                                                        |

| Residue # | Residue #       |                 | Chemical Shift (ppm) |                |                |                |                |                                                                                                                            | Others |
|-----------|-----------------|-----------------|----------------------|----------------|----------------|----------------|----------------|----------------------------------------------------------------------------------------------------------------------------|--------|
|           | <sup>b</sup> SN | <sup>c</sup> CN | N                    | H <sup>N</sup> | C <sup>α</sup> | C <sup>β</sup> | C <sup>γ</sup> |                                                                                                                            |        |
| Gln       | 187             | 180             | 119.3                | 8.55           | 55.86          | 27.87          | 175.3          | C <sub>γ</sub> : 33.99; C <sub>δ</sub> : 180.60<br>N <sub>ε</sub> 2: 112.2<br>H <sub>ε</sub> 21/ε22: 7.49, 6.80            |        |
| Trp       | 188             | 181             | 119.9                | 6.96           | 56.80          | 30.05          | 176.0          |                                                                                                                            |        |
| Gly       | 189             | 182             | 113.7                | 7.76           | 46.56          | ---            | 173.8          |                                                                                                                            |        |
| Glu       | 190             | 183             | 123.2                | 9.49           | 53.94          | 25.92          | 176.9          | C <sub>γ</sub> : 35.80                                                                                                     |        |
| Glu       | 191             | 184             | 121.3                | 8.55           | 56.72          | 27.03          | 176.5          | C <sub>γ</sub> : 35.91                                                                                                     |        |
| Gly       | 192             | 185             | 103.9                | 8.34           | 45.88          | ---            |                |                                                                                                                            |        |
| Tyr       | 193             | 186             |                      |                |                |                |                |                                                                                                                            |        |
| Ile       | 194             | 187             |                      |                |                |                |                |                                                                                                                            |        |
| Arg       | 195             | 188             |                      |                |                |                |                | C <sub>γ</sub> : 25.36; C <sub>δ</sub> : 41.94<br>C <sub>ζ</sub> : 160.0;<br>N <sub>ε</sub> : 85.53; H <sub>ε</sub> : 8.87 |        |
| Ile       | 196             | 189             |                      |                |                |                |                |                                                                                                                            |        |
| Ala       | 197             | 190             |                      |                | 52.13          | 18.21          | 175.3          |                                                                                                                            |        |
| Lys       | 198             | 191             | 123.2                | 8.22           | 54.88          | 35.24          | 176.1          |                                                                                                                            |        |
| Gly       | 199             | 192             | 115.3                | 9.19           | 45.21          | ---            | 174.1          |                                                                                                                            |        |
| Ser       | 200             | 193             | 115.0                | 8.52           | 55.94          | 61.68          | 173.7          |                                                                                                                            |        |
| Asn       | 201             | 198             | 125.0                | 9.81           | 52.27          | 36.87          | 176.7          |                                                                                                                            |        |
| Gln       | 202             | 199             | 121.9                | 10.22          | 56.70          | 27.63          | 178.0          | C <sub>γ</sub> : 33.55                                                                                                     |        |
| Cys       | 203             | 200             | 113.1                | 8.67           | 52.72          | 35.88          | 175.0          |                                                                                                                            |        |
| Leu       | 204             | 201             | 111.2                | 8.18           | 55.77          | 37.02          | 176.2          | C <sub>δ</sub> 1/δ2: 21.56, 21.56                                                                                          |        |
| Val       | 205             | 202             | 114.4                | 6.61           | 63.41          | 31.07          | 174.9          | C <sub>γ</sub> 1/γ2: 21.12, 20.25                                                                                          |        |
| Lys       | 206             | 203             | 117.9                | 8.09           | 54.61          | 33.51          | 177.2          |                                                                                                                            |        |
| Glu       | 207             | 204             | 118.3                | 7.91           | 58.66          | 29.35          | 177.6          | C <sub>γ</sub> : 35.86                                                                                                     |        |
| Glu       | 208             | 205             | 126.2                | 10.38          | 55.34          | 28.81          | 172.6          | C <sub>γ</sub> : 33.95                                                                                                     |        |
| Ala       | 209             | 206             | 128.4                | 8.97           | 49.29          | 20.62          | 177.9          |                                                                                                                            |        |
| Ser       | 210             | 207             | 117.0                | 9.76           | 56.45          | 66.81          |                |                                                                                                                            |        |
| Ser       | 211             | 208             |                      |                |                |                |                |                                                                                                                            |        |
| Ala       | 212             | 209             |                      |                | 51.84          | 19.80          | 176.5          |                                                                                                                            |        |
| Val       | 213             | 210             | 121.1                | 7.84           | 61.13          | 33.03          | 174.9          | C <sub>γ</sub> 1/γ2: 20.00, 19.27                                                                                          |        |
| Val       | 214             | 211             | 125.0                | 8.94           | 62.18          | 32.28          | 175.5          | C <sub>γ</sub> 1/γ2: 21.23, 20.23                                                                                          |        |
| Gly       | 215             | 212             | 117.6                | 8.07           | 45.80          | ---            |                |                                                                                                                            |        |

<sup>a</sup> Chemical shifts not corrected for <sup>2</sup>H-isotope effects; Catalytic residues in boldface.

<sup>b</sup> SN = sequential numbering (residues 1-215), used for cruzain-inhibitor crystal structures published after 2009, starting with 2OZ2.<sup>7</sup>

<sup>c</sup> CN = "classical" numbering (residues 1-212, includes insertions and deletions) corresponding to papain,<sup>6</sup> used for cruzain-inhibitor crystal structures published prior to 2009.

<sup>d</sup> Methionine ε-methyl <sup>13</sup>C/<sup>1</sup>H resonances assigned from selective <sup>13</sup>C-Met labeled sample.

<sup>e</sup> Cys36 backbone amide resonances assigned from selective <sup>15</sup>N-Cys labeled sample.

**Table S2: Selectively  $^{15}\text{N}$ -His,  $^{15}\text{N}$ -Cys,  $^{13}\text{C}$ -Met labeled cruzain pK<sub>a</sub> values (Major conformer, 27 °C)**

| Residue #                | <sup>a</sup> Fitted pK <sub>a</sub> values |                 |                    |                      |                    |                      |
|--------------------------|--------------------------------------------|-----------------|--------------------|----------------------|--------------------|----------------------|
|                          | <sup>c</sup> SN                            | <sup>d</sup> CN | <sup>b</sup> MMTS  |                      | K777               |                      |
|                          |                                            |                 | pK <sub>a</sub> 1  | pK <sub>a</sub> 2    | pK <sub>a</sub> 1  | pK <sub>a</sub> 2    |
| Cys<br>amide             | 22                                         | 22              | 5.59 ± 0.47        | ----                 | 3.87 ± 0.67        | 7.55 ± 0.70          |
|                          | <b>25</b>                                  | <b>25</b>       | <b>3.83 ± 0.52</b> | ----                 | <b>4.76 ± 0.47</b> | <b>7.28 ± 0.59</b>   |
|                          | 36                                         | 36              | 4.27 ± 0.44        | 7.12 ± 0.56          | 4.49 ± 0.60        | 7.83 ± 0.70          |
|                          | 56                                         | 56              | 5.13 ± 0.27        | 8.29 ± 0.63          | 4.43 ± 0.40        | 7.68 ± 0.53          |
|                          | 63                                         | 63              | 4.32 ± 0.66        | 7.75 ± 0.52          | 6.04 ± 0.41        | ----                 |
|                          | 101                                        | 95              | ----               | 7.06 ± 0.13          | 4.85 ± 1.09        | 7.51 ± 0.57          |
|                          | 155                                        | 153             | 3.82 ± 0.36        | 7.29 ± 0.68          | 4.97 ± 0.40        | 7.52 ± 0.59          |
| 203                      | 200                                        | 4.03 ± 0.55     | 6.52 ± 0.51        | ----                 | 6.42 ± 0.30        |                      |
| His<br>amide             | 43                                         | 43              | ----               | 8.04 ± 0.04          | ----               | 8.10 ± 0.04          |
|                          | 106                                        | 100             | ----               | 7.88 ± 0.02          | ----               | 8.11 ± 0.02          |
|                          | 115                                        | 110             | 4.36 ± 0.46        | 7.42 ± 0.05          | 5.23 ± 0.50        | 7.59 ± 0.10          |
|                          | <b>162</b>                                 | <b>159</b>      | <b>3.98 ± 0.51</b> | <b>6.75 ± 0.07</b>   | <b>5.35 ± 0.25</b> | <b>9.13 ± 0.74</b>   |
|                          | <b>162a</b>                                | <b>159a</b>     | <b>5.52 ± 0.54</b> | <b>8.41 ± 0.53</b>   | ----               | ----                 |
| Met<br>ε-CH <sub>3</sub> | 52                                         | 52              | 4.94 ± 0.67        | 8.34 ± 0.55          | 5.49 ± 0.75        | 8.63 ± 0.74          |
|                          | <b>68</b>                                  | <b>68</b>       | <b>6.53 ± 0.35</b> | <b>(7.91 ± 0.71)</b> | ----               | <b>7.83 ± 0.28</b>   |
|                          | <b>68'</b>                                 | <b>68'</b>      | <b>4.72 ± 0.72</b> | <b>7.66 ± 0.60</b>   | <b>6.50 ± 0.66</b> | <b>(8.89 ± 0.99)</b> |
|                          | <b>145</b>                                 | <b>142</b>      | <b>5.42 ± 0.76</b> | <b>(8.07 ± 1.01)</b> | <b>5.98 ± 0.41</b> | <b>(9.21 ± 0.80)</b> |
|                          | 152                                        | 149             | 5.15 ± 0.71        | 8.21 ± 0.69          | 6.05 ± 0.74        | 8.88 ± 0.69          |

**Boldface** indicates residues positioned in substrate binding pocket.

<sup>a</sup> Fitted pK<sub>a</sub> values calculated using PEAT/EKIN,<sup>4</sup> and represent averages and propagated errors of the  $^1\text{H}$  and  $^{15}\text{N}$  (Cys, His) or  $^{13}\text{C}$  (Met) resonances. Estimated pH ( $\sigma = 0.1$ ) and chemical shift ( $\sigma = 0.05$ ) errors were used for the curve fitting. Curve fitting calculations were performed 3 times.

Parentheses indicate single atom curve fitting (either  $^1\text{H}$ , or  $^{13}\text{C}/^{15}\text{N}$ ; no average).

<sup>b</sup> MMTS = methyl methylthiomethyl sulfoxide.

<sup>c</sup> SN = sequential numbering (residues 1-215), used for cruzain-inhibitor crystal structures published after 2009, starting with 2OZ2.<sup>7</sup>

<sup>d</sup> CN = "classical" numbering (residues 1-212, includes insertions and deletions) corresponding to Papain,<sup>6</sup> used for cruzain-inhibitor crystal structures published prior to 2009.



## REFERENCES

1. Studier, F. W. (2005) Protein production by auto-induction in high density shaking cultures, *Protein Expr Purif* 41, 207-234.
2. Weber, D. J., Gittis, A. G., Mullen, G. P., Abeygunawardana, C., Lattman, E. E., and Mildvan, A. S. (1992) NMR docking of a substrate into the X-ray structure of staphylococcal nuclease, *Proteins* 13, 275-287.
3. Delaglio, F., Grzesiek, S., Vuister, G. W., Zhu, G., Pfeifer, J., and Bax, A. (1995) NMRPipe: a multidimensional spectral processing system based on UNIX pipes, *J Biomol NMR* 6, 277-293.
4. Farrell, D., Miranda, E. S., Webb, H., Georgi, N., Crowley, P. B., McIntosh, L. P., and Nielsen, J. E. (2010) Titration\_DB: storage and analysis of NMR-monitored protein pH titration curves, *Proteins* 78, 843-857.
5. Webb, H., Tynan-Connolly, B. M., Lee, G. M., Farrell, D., O'Meara, F., Sondergaard, C. R., Teilum, K., Hewage, C., McIntosh, L. P., and Nielsen, J. E. (2011) Remeasuring HEWL pK(a) values by NMR spectroscopy: methods, analysis, accuracy, and implications for theoretical pK(a) calculations, *Proteins* 79, 685-702.
6. Kamphuis, I. G., Kalk, K. H., Swarte, M. B., and Drenth, J. (1984) Structure of papain refined at 1.65 Å resolution, *J Mol Biol* 179, 233-256.
7. Kerr, I. D., Lee, J. H., Farady, C. J., Marion, R., Rickert, M., Sajid, M., Pandey, K. C., Caffrey, C. R., Legac, J., Hansell, E., McKerrow, J. H., Craik, C. S., Rosenthal, P. J., and Brinen, L. S. (2009) Vinyl sulfones as antiparasitic agents and a structural basis for drug design, *J Biol Chem* 284, 25697-25703.
8. Johnson, F. A., Lewis, S. D., and Shafer, J. A. (1981) Determination of a low pK for histidine-159 in the S-methylthio derivative of papain by proton nuclear magnetic resonance spectroscopy, *Biochemistry* 20, 44-48.
9. Pinitglang, S., Watts, A. B., Patel, M., Reid, J. D., Noble, M. A., Gul, S., Bokth, A., Naeem, A., Patel, H., Thomas, E. W., Sreedharan, S. K., Verma, C., and Brocklehurst, K. (1997) A Classical Enzyme Active Center Motif Lacks Catalytic Competence until Modulated Electrostatically, *Biochemistry* 36, 9968-9982.
10. Polgar, L. (1974) Mercaptide-imidazolium ion-pair: the reactive nucleophile in papain catalysis, *FEBS Lett* 47, 15-18.
11. Gillmor, S. A., Craik, C. S., and Fletterick, R. J. (1997) Structural determinants of specificity in the cysteine protease cruzain, *Protein Sci* 6, 1603-1611.
